# Supplementary material for: Identification of Sequence Variants in Genetic Disease-Causing Genes Using Targeted Next-Generation Sequencing
Source: PLoS One. 2011 Dec 21;6(12):e29500. doi: 10.1371/journal.pone.0029500 (PMC3244462; doi:10.1371/journal.pone.0029500)
Supplement: Table S1 — The list of 193 genes causing distinct hereditary diseases with a higher incidence in the Chinese population. (XLS) [file pone.0029500.s003.xls]

## Sheet: gene_diseases
Gene Symbol	Disease Names (in OMIM)
ABCA12	Ichthyosis Congenita, Harlequin Fetus Type
ABCC1	Malignant arrhythmias
ABCC8	Hyperinsulinemic Hypoglycemia, Familial, 1; Hhf1
ACTC1	Malignant arrhythmias
ACTN2	Malignant arrhythmias
AGA	Aspartylglucosaminuria
AGL	Glycogen Storage Disease Iii
AGXT	Hyperoxaluria, Primary, Type I
AHI1	Joubert syndrome
AKAP9	Malignant arrhythmias
ALAS2	Anemia, Sideroblastic, X-Linked; Xlsa
ALDOB	Fructose Intolerance, Hereditary
ANK2	Malignant arrhythmias
APC	Familial malignant neoplasms; Adenomatous Polyposis Of The Colon; Apc
ARL13B	Joubert syndrome
ARSA	Metachromatic Leukodystrophy
ATM	Familial malignant neoplasms; Ataxia-Telangiectasia; At
ATP7B	Wilson Disease
AXIN2	Familial malignant neoplasms
BARD1	Familial malignant neoplasms
BCKDHA	Maple Syrup Urine Disease
BCKDHB	Maple Syrup Urine Disease
BLM	Bloom Syndrome
BRCA1	Familial malignant neoplasms
BRCA2	Familial malignant neoplasms
BRIP1	Familial malignant neoplasms
BTD	Biotinidase Deficiency
CACNA1C	Malignant arrhythmias
CACNB2	Malignant arrhythmias
CAV3	Malignant arrhythmias
CC2D2A	Joubert syndrome
CDC73	Familial malignant neoplasms
CDH1	Familial malignant neoplasms
CDH23	Usher syndrome
CEP290	Joubert syndrome
CFTR	Cystic Fibrosis
CHEK2	Familial malignant neoplasms
CHM	Choroideremia; Chm
COL1A1	Osteogenesis Imperfecta
COL1A2	Osteogenesis Imperfecta
COL4A5	Alport Syndrome, X-Linked
COMP	Epiphyseal Dysplasia, Multiple, 1
CRTAP	Osteogenesis Imperfecta
CSRP3	Malignant arrhythmias
CSTB	Cystinosis, Nephropathic
CTF1	Malignant arrhythmias
CTNS	Cystinosis, Nephropathic
CTSK	Pycnodysostosis
CYP21A2	Adrenal Hyperplasia, Congenital, Due To 21-Beta-Hydroxylase Deficiency
DBT	Maple Syrup Urine Disease
DES	Malignant arrhythmias
DLD	Maple Syrup Urine Disease
DMD	Muscular Dystrophy, Duchenne Type
DMPK	Myotonic dystrophy 1
DSC2	Malignant arrhythmias
DSG2	Malignant arrhythmias
DSP	Malignant arrhythmias
EMD	Malignant arrhythmias
EPCAM	Familial malignant neoplasms
EXT1	Exostoses, Multiple, Type I
EXT2	Exostoses, Multiple, Type Ii
F5	Factor V Deficiency
F8	Hemophilia A
FAH	Tyrosinemia Type I
FBN1	Marfan Syndrome
FGD1	Faciogenital Dysplasiafaciogenital Dysplasia With Attention Deficit-Hyperactivity Disorder, Included
FGFR2	Apert Syndrome
FGFR3	Achondroplasia; Ach
FH	Familial malignant neoplasms
FKRP	Muscle-Eye-Brain Disease; Meb
FMR1	Fragile X Mental Retardation Syndrome
FXN	Friedreich ataxia
G6PC	Glycogen Storage Disease Type Ia
G6PD	Glucose-6-Phosphate Dehydrogenase Deficiency
GAA	Glycogen Storage Disease Ii
GALC	Krabbe Disease
GALT	Galactosemia
GBA	Gaucher Disease
GCDH	Glutaric Acidemia I
GCH1	Hyperphenylalaninemia, Bh4-Deficient, B
GHR	Laron Syndrome
GJB2	Deafness, Autosomal Recessive 1A; Dfnb1A
GJB6	Deafness, Autosomal Dominant 3A; Dfna3A
GLA	Malignant arrhythmias
GLI3	Greig Cephalopolysyndactyly Syndrome; Gcps
GPD1L	Malignant arrhythmias
GPR143	Albinism, Ocular, Type I; Oa1
GRHPR	Hyperoxaluria, Primary, Type II
HADHA	Long-Chain 3-Hydroxyacyl-Coa Dehydrogenase Deficiency
HBA1	Thalassemias
HBA2	Thalassemias
HBB	Thalassemias; Sickle Cell Anemia
HEXA	Tay-Sachs disease
HOXD13	Synpolydactyly 1
HTT	Huntington Disease; Hd
IDS	Mucopolysaccharidosis Type Ii
IDUA	Hurler Syndrome
IL2RG	Severe Combined Immunodeficiency, X-Linked; Scidx1
INPP5E	Joubert syndrome
IVD	Isovaleric Acidemia; Iva
KCNE1	Malignant arrhythmias
KCNE2	Malignant arrhythmias
KCNH2	Malignant arrhythmias
KCNJ2	Malignant arrhythmias
KCNQ1	Malignant arrhythmias
KIT	Familial malignant neoplasms
KRT1	Epidermolytic Hyperkeratosis; Ehk
KRT10	Epidermolytic Hyperkeratosis; Ehk
LAMA3	Epidermolysis Bullosa, Junctional, Herlitz Type
LAMB3	Epidermolysis Bullosa, Junctional, Herlitz Type
LAMC2	Epidermolysis Bullosa, Junctional, Herlitz Type
LAMP2	Malignant arrhythmias
LCAT	Lecithin:Cholesterol Acyltransferase Deficiency
LDB3	Malignant arrhythmias
LMNA	Hutchinson-Gilford Progeria Syndrome; Malignant arrhythmias
MET	Familial malignant neoplasms
MLH1	Familial malignant neoplasms
MLH3	Familial malignant neoplasms
MPI	Congenital Disorder Of Glycosylation, Type Ib; Cdg1B
MPZ	Charcot-Marie-Tooth disease; Dejerine-Sottas syndrome; Roussy-Levy syndrome; Neuropathy, congenital hypomyelinating
MRE11	Familial malignant neoplasms
MSH2	Familial malignant neoplasms
MSH6	Familial malignant neoplasms
MUTYH	Familial malignant neoplasms
MYBPC3	Malignant arrhythmias
MYH7	Malignant arrhythmias
MYL2	Malignant arrhythmias
MYL3	Malignant arrhythmias
MYO7A	Usher syndrome, type 1B; Deafness, autosomal dominant 11, neurosensory; Deafness, autosomal recessive 2, neurosensory
NBN	Familial malignant neoplasms
NPC1	Niemann-Pick Disease, Type C1
NPHP1	Joubert syndrome
NTRK1	Familial malignant neoplasms
OFD1	Joubert syndrome
PAH	Phenylketonuria
PALB2	Familial malignant neoplasms
PDGFRA	Familial malignant neoplasms
PEX1	Refsum Disease, Infantile Form
PEX2	Refsum disease, infantile form
PEX26	Refsum Disease, Infantile Form
PEX7	Rhizomelic Chondrodysplasia Punctata, Type 1; Rcdp1
PKD1	Polycystic Kidneys
PKHD1	Polycystic Kidney Disease, Autosomal Recessive
PKP2	Malignant arrhythmias
PLN	Malignant arrhythmias
PMM2	Congenital Disorder Of Glycosylation, Type Ia; Cdg1A
PMP22	Charcot-Marie-Tooth disease; Dejerine-Sottas syndrome; Roussy-Levy syndrome; Neuropathy, recurrent, with pressure palsies
PMS1	Familial malignant neoplasms
PMS2	Familial malignant neoplasms
POMGNT1	Muscle-Eye-Brain Disease; Meb
PPT1	Ceroid Lipofuscinosis, Neuronal, 1; Cln1
PRKAG2	Malignant arrhythmias
PTEN	Familial malignant neoplasms
PTS	Hyperphenylalaninemia, Bh4-Deficient, A
PYGM	Glycogen Storage Disease V
RAD50	Familial malignant neoplasms
RAD51C	Familial malignant neoplasms
RET	Familial malignant neoplasms
RP1	Retinitis pigmentosa 1
RPGR	Retinitis Pigmentosa 3; Rp3
RPGRIP1L	Joubert syndrome
RS1	X-Linked Juvenile Retinoschisis
SACS	Spastic Ataxia, Charlevoix-Saguenay Type; Sacs
SCN1B	Malignant arrhythmias
SCN4B	Malignant arrhythmias
SCN5A	Malignant arrhythmias
SGCD	Malignant arrhythmias
SLC12A6	Agenesis of the corpus callosum with peripheral neuropathy
SLC25A15	Hyperornithinemia-Hyperammonemia-Homocitrullinuria Syndrome
SLC26A2	Diastrophic Dysplasia
SLC26A4	Pendred Syndrome; Pds
SMN1	Spinal Muscular Atrophy
SMPD1	Niemann-Pick Disease
SNTA1	Malignant arrhythmias
SPG11	Spastic Paraplegia 11, Autosomal Recessive
STK11	Familial malignant neoplasms
STS	Ichthyosis, X-Linked; Xli
TAZ	Malignant arrhythmias
TBX5	Holt-Oram Syndrome
TCAP	Malignant arrhythmias
TH	Segawa Syndrome, Autosomal Recessive
TMEM216	Joubert syndrome
TMEM43	Malignant arrhythmias
TMEM67	Joubert syndrome
TNNI3	Malignant arrhythmias
TNNT2	Malignant arrhythmias
TP53	Familial malignant neoplasms
TPM1	Malignant arrhythmias
TSC1	Tuberous Sclerosis 1
TSC2	Tuberous Sclerosis 2
TTPA	Vitamin E, Familial Isolated Deficiency Of; Ved
USH2A	Retinitis pigmentosa 39; Usher syndrome, type 2A
VCL	Cardiomyopathy, dilated, 1W; Cardiomyopathy, familial hypertrophic, 15
