# Supplementary material for: Identification of Sequence Variants in Genetic Disease-Causing Genes Using Targeted Next-Generation Sequencing
Source: PLoS One. 2011 Dec 21;6(12):e29500. doi: 10.1371/journal.pone.0029500 (PMC3244462; doi:10.1371/journal.pone.0029500)
Supplement: Table S2 — The information of DNA probes designed for the 193 genes including 3382 exons plus their flanking sequences. (XLS) [file pone.0029500.s004.xls]

## Sheet: Info
Gene Symbol	NM_number	Chromosome Name	Exon	Gene Start (bp)	Gene End (bp)	GC%
ABCA12	NM_173076	chr2	1	216002763	216003251	43.35
ABCA12	NM_173076	chr2	2	215976220	215976513	27.55
ABCA12	NM_173076	chr2	3	215928689	215929042	41.24
ABCA12	NM_173076	chr2	4	215919197	215919488	38.36
ABCA12	NM_173076	chr2	5	215917111	215917408	40.6
ABCA12	NM_173076	chr2	6	215914250	215914635	35.23
ABCA12	NM_173076	chr2	7	215910461	215910839	32.98
ABCA12	NM_173076	chr2	8	215901577	215901889	37.38
ABCA12	NM_173076	chr2	9	215896445	215896720	33.33
ABCA12	NM_173076	chr2	10	215891444	215891762	36.36
ABCA12	NM_173076	chr2	11	215890297	215890603	30.62
ABCA12	NM_173076	chr2	12	215884220	215884620	37.66
ABCA12	NM_173076	chr2	13	215883960	215884218	36.68
ABCA12	NM_173076	chr2	14	215882632	215882956	37.23
ABCA12	NM_173076	chr2	15	215880114	215880487	35.03
ABCA12	NM_173076	chr2	16	215876536	215876959	36.56
ABCA12	NM_173076	chr2	17	215876063	215876534	33.26
ABCA12	NM_173076	chr2	18	215874955	215875294	33.53
ABCA12	NM_173076	chr2	19	215872351	215872670	35.62
ABCA12	NM_173076	chr2	20	215868833	215869123	35.4
ABCA12	NM_173076	chr2	21	215866182	215866561	35.26
ABCA12	NM_173076	chr2	22	215865329	215865844	40.31
ABCA12	NM_173076	chr2	23	215862319	215862633	33.97
ABCA12	NM_173076	chr2	24	215855326	215855855	37.36
ABCA12	NM_173076	chr2	25	215854233	215854445	38.97
ABCA12	NM_173076	chr2	26	215853953	215854231	36.2
ABCA12	NM_173076	chr2	27	215852271	215852617	38.04
ABCA12	NM_173076	chr2	28	215851166	215851552	35.4
ABCA12	NM_173076	chr2	29	215848271	215848689	39.86
ABCA12	NM_173076	chr2	30	215846811	215847207	39.04
ABCA12	NM_173076	chr2	31	215845107	215845467	44.6
ABCA12	NM_173076	chr2	32	215843361	215843864	41.07
ABCA12	NM_173076	chr2	33	215842940	215843359	34.52
ABCA12	NM_173076	chr2	34	215840409	215840861	42.38
ABCA12	NM_173076	chr2	35	215839402	215839688	39.37
ABCA12	NM_173076	chr2	36	215838573	215838866	36.05
ABCA12	NM_173076	chr2	37	215834897	215835224	32.01
ABCA12	NM_173076	chr2	38	215833344	215833631	32.29
ABCA12	NM_173076	chr2	39	215831472	215831777	35.62
ABCA12	NM_173076	chr2	40	215823648	215823902	34.9
ABCA12	NM_173076	chr2	41	215822901	215823278	37.57
ABCA12	NM_173076	chr2	42	215821287	215821602	33.54
ABCA12	NM_173076	chr2	43	215819826	215820185	40
ABCA12	NM_173076	chr2	44	215818478	215818931	33.92
ABCA12	NM_173076	chr2	45	215815503	215815907	37.53
ABCA12	NM_173076	chr2	46	215813614	215813973	36.11
ABCA12	NM_173076	chr2	47	215813220	215813612	40.46
ABCA12	NM_173076	chr2	48	215812046	215812380	38.21
ABCA12	NM_173076	chr2	49	215809625	215809928	35.86
ABCA12	NM_173076	chr2	50	215807549	215807841	38.57
ABCA12	NM_173076	chr2	51	215802134	215802439	42.81
ABCA12	NM_173076	chr2	52	215798702	215799039	35.21
ABCA12	NM_173076	chr2	53	215796167	215797565	41.1
ABCC1	NM_004996	chr16	1	16043334	16043756	83.92
ABCC1	NM_004996	chr16	2	16101573	16101949	53.58
ABCC1	NM_004996	chr16	3	16103533	16103858	53.07
ABCC1	NM_004996	chr16	4	16108248	16108585	50.89
ABCC1	NM_004996	chr16	5	16110253	16110578	50.92
ABCC1	NM_004996	chr16	6	16126866	16127127	53.05
ABCC1	NM_004996	chr16	7	16130229	16130560	57.83
ABCC1	NM_004996	chr16	8	16138207	16138637	54.29
ABCC1	NM_004996	chr16	9	16139593	16139970	57.67
ABCC1	NM_004996	chr16	10	16141899	16142260	56.63
ABCC1	NM_004996	chr16	11	16146481	16146773	57
ABCC1	NM_004996	chr16	12	16149849	16150252	48.27
ABCC1	NM_004996	chr16	13	16161913	16162259	59.65
ABCC1	NM_004996	chr16	14	16165399	16165686	53.12
ABCC1	NM_004996	chr16	15	16170083	16170358	56.16
ABCC1	NM_004996	chr16	16	16173109	16173435	57.8
ABCC1	NM_004996	chr16	17	16177123	16177499	53.58
ABCC1	NM_004996	chr16	18	16180581	16180948	55.71
ABCC1	NM_004996	chr16	19	16184162	16184545	60.16
ABCC1	NM_004996	chr16	20	16196384	16196674	57.73
ABCC1	NM_004996	chr16	21	16200495	16200830	55.95
ABCC1	NM_004996	chr16	22	16205132	16205539	56.13
ABCC1	NM_004996	chr16	23	16208523	16209033	57.14
ABCC1	NM_004996	chr16	24	16215732	16216131	59.5
ABCC1	NM_004996	chr16	25	16218546	16218872	55.05
ABCC1	NM_004996	chr16	26	16219567	16219868	49.01
ABCC1	NM_004996	chr16	27	16225546	16225892	59.65
ABCC1	NM_004996	chr16	28	16228107	16228465	58.5
ABCC1	NM_004996	chr16	29	16230235	16230601	55.59
ABCC1	NM_004996	chr16	30	16232121	16232515	55.44
ABCC1	NM_004996	chr16	31	16234930	16237028	49.21
ABCC8	NM_000352	chr11	1	17498076	17498549	75.74
ABCC8	NM_000352	chr11	2	17496333	17496674	55.56
ABCC8	NM_000352	chr11	3	17491548	17491869	49.07
ABCC8	NM_000352	chr11	4	17484885	17485251	56.68
ABCC8	NM_000352	chr11	5	17483030	17483472	56.88
ABCC8	NM_000352	chr11	6	17481935	17482323	60.93
ABCC8	NM_000352	chr11	7	17474566	17474930	42.19
ABCC8	NM_000352	chr11	8	17469963	17470318	50
ABCC8	NM_000352	chr11	9	17464579	17464959	54.59
ABCC8	NM_000352	chr11	10	17464167	17464577	61.07
ABCC8	NM_000352	chr11	11	17453651	17453891	58.92
ABCC8	NM_000352	chr11	12	17452261	17452606	60.69
ABCC8	NM_000352	chr11	13	17450034	17450317	63.38
ABCC8	NM_000352	chr11	14	17449664	17450032	63.69
ABCC8	NM_000352	chr11	15	17449314	17449662	53.87
ABCC8	NM_000352	chr11	16	17448496	17448801	58.17
ABCC8	NM_000352	chr11	17	17438377	17438609	55.79
ABCC8	NM_000352	chr11	18	17436751	17436986	60.59
ABCC8	NM_000352	chr11	19	17435959	17436257	58.53
ABCC8	NM_000352	chr11	20	17434841	17435125	56.14
ABCC8	NM_000352	chr11	21	17434113	17434393	58.36
ABCC8	NM_000352	chr11	22	17431963	17432300	55.33
ABCC8	NM_000352	chr11	23	17429839	17430164	53.68
ABCC8	NM_000352	chr11	24	17428790	17429100	52.09
ABCC8	NM_000352	chr11	25	17428387	17428788	61.69
ABCC8	NM_000352	chr11	26	17428069	17428385	56.78
ABCC8	NM_000352	chr11	27	17426941	17427210	49.26
ABCC8	NM_000352	chr11	28	17425959	17426316	54.47
ABCC8	NM_000352	chr11	29	17424108	17424400	60.07
ABCC8	NM_000352	chr11	30	17419786	17420088	56.11
ABCC8	NM_000352	chr11	31	17419047	17419444	63.32
ABCC8	NM_000352	chr11	32	17418668	17419045	61.64
ABCC8	NM_000352	chr11	33	17418363	17418666	63.49
ABCC8	NM_000352	chr11	34	17417334	17417577	61.48
ABCC8	NM_000352	chr11	35	17416991	17417332	63.16
ABCC8	NM_000352	chr11	36	17416619	17416989	59.84
ABCC8	NM_000352	chr11	37	17415713	17416046	55.39
ABCC8	NM_000352	chr11	38	17415144	17415406	62.74
ABCC8	NM_000352	chr11	39	17414333	17414775	58.01
ACTC1	NM_005159	chr15	1	35087607	35088027	71.73
ACTC1	NM_005159	chr15	2	35086781	35087131	64.67
ACTC1	NM_005159	chr15	3	35085346	35085870	50.48
ACTC1	NM_005159	chr15	4	35084547	35084870	53.4
ACTC1	NM_005159	chr15	5	35084191	35084545	47.89
ACTC1	NM_005159	chr15	6	35083215	35083596	45.29
ACTC1	NM_005159	chr15	7	35080197	35082856	38.8
ACTN2	NM_001103	chr1	1	236849670	236850199	76.98
ACTN2	NM_001103	chr1	2	236881058	236881372	45.71
ACTN2	NM_001103	chr1	3	236882094	236882413	48.12
ACTN2	NM_001103	chr1	4	236883305	236883591	33.1
ACTN2	NM_001103	chr1	5	236889133	236889420	49.31
ACTN2	NM_001103	chr1	6	236890878	236891156	54.48
ACTN2	NM_001103	chr1	7	236894433	236894714	37.23
ACTN2	NM_001103	chr1	8	236898835	236899120	50
ACTN2	NM_001103	chr1	9	236900322	236900614	50.85
ACTN2	NM_001103	chr1	10	236902502	236902932	54.06
ACTN2	NM_001103	chr1	11	236906096	236906443	49.71
ACTN2	NM_001103	chr1	12	236907826	236908176	58.97
ACTN2	NM_001103	chr1	13	236910867	236911175	37.22
ACTN2	NM_001103	chr1	14	236912324	236912664	38.71
ACTN2	NM_001103	chr1	15	236914670	236915052	53.52
ACTN2	NM_001103	chr1	16	236917147	236917481	59.4
ACTN2	NM_001103	chr1	17	236918219	236918598	55.26
ACTN2	NM_001103	chr1	18	236920686	236921032	46.11
ACTN2	NM_001103	chr1	19	236922924	236923189	40.98
ACTN2	NM_001103	chr1	20	236924215	236924573	48.47
ACTN2	NM_001103	chr1	21	236925661	236927658	38.74
AGA	NM_000027	chr4	1	178363303	178363691	68.38
AGA	NM_000027	chr4	2	178361327	178361680	41.81
AGA	NM_000027	chr4	3	178360630	178360942	33.87
AGA	NM_000027	chr4	4	178359799	178360111	37.38
AGA	NM_000027	chr4	5	178358459	178358773	33.02
AGA	NM_000027	chr4	6	178357330	178357605	37.32
AGA	NM_000027	chr4	7	178355436	178355743	43.18
AGA	NM_000027	chr4	8	178354268	178354601	33.83
AGA	NM_000027	chr4	9	178351824	178353062	32.69
AGL	NM_000642	chr1	1	100315540	100316071	68.61
AGL	NM_000642	chr1	2	100316431	100316780	34.86
AGL	NM_000642	chr1	3	100326959	100327369	32.6
AGL	NM_000642	chr1	4	100327713	100328079	33.51
AGL	NM_000642	chr1	5	100329842	100330245	32.43
AGL	NM_000642	chr1	6	100335856	100336225	34.86
AGL	NM_000642	chr1	7	100336227	100336525	27.42
AGL	NM_000642	chr1	8	100340143	100340466	30.25
AGL	NM_000642	chr1	9	100340610	100340863	33.07
AGL	NM_000642	chr1	10	100340865	100341111	33.6
AGL	NM_000642	chr1	11	100341914	100342253	32.65
AGL	NM_000642	chr1	12	100343097	100343484	36.34
AGL	NM_000642	chr1	13	100345379	100345702	34.26
AGL	NM_000642	chr1	14	100346088	100346451	35.99
AGL	NM_000642	chr1	15	100346532	100346790	33.59
AGL	NM_000642	chr1	16	100346792	100347050	35.91
AGL	NM_000642	chr1	17	100347052	100347347	34.12
AGL	NM_000642	chr1	18	100349576	100349847	31.25
AGL	NM_000642	chr1	19	100349849	100350066	28.44
AGL	NM_000642	chr1	20	100350068	100350359	34.93
AGL	NM_000642	chr1	21	100353434	100353764	37.16
AGL	NM_000642	chr1	22	100356676	100357012	33.53
AGL	NM_000642	chr1	23	100357062	100357395	33.83
AGL	NM_000642	chr1	24	100357888	100358263	32.45
AGL	NM_000642	chr1	25	100361742	100362044	37.29
AGL	NM_000642	chr1	26	100366092	100366517	34.98
AGL	NM_000642	chr1	27	100368139	100368450	36.54
AGL	NM_000642	chr1	28	100376168	100376503	27.68
AGL	NM_000642	chr1	29	100377861	100378173	31.63
AGL	NM_000642	chr1	30	100378983	100379394	32.77
AGL	NM_000642	chr1	31	100380845	100381142	31.88
AGL	NM_000642	chr1	32	100381866	100382103	26.05
AGL	NM_000642	chr1	33	100382105	100382387	32.86
AGL	NM_000642	chr1	34	100386990	100389679	29.33
AGXT	NM_000030	chr2	1	241808062	241808517	64.25
AGXT	NM_000030	chr2	2	241808519	241808879	63.43
AGXT	NM_000030	chr2	3	241809961	241810225	67.55
AGXT	NM_000030	chr2	4	241810666	241810966	67.77
AGXT	NM_000030	chr2	5	241812296	241812566	67.16
AGXT	NM_000030	chr2	6	241813295	241813579	65.61
AGXT	NM_000030	chr2	7	241814426	241814721	61.82
AGXT	NM_000030	chr2	8	241815252	241815521	61.48
AGXT	NM_000030	chr2	9	241816854	241817149	67.23
AGXT	NM_000030	chr2	10	241817339	241817667	62.92
AGXT	NM_000030	chr2	11	241818031	241818635	63.97
AHI1	NM_001134831	chr6	1	135818556	135819003	72.54
AHI1	NM_001134831	chr6	2	135818226	135818554	37.39
AHI1	NM_001134831	chr6	3	135816852	135817136	34.39
AHI1	NM_001134831	chr6	4	135813266	135813529	30.68
AHI1	NM_001134831	chr6	5	135811661	135811985	32.31
AHI1	NM_001134831	chr6	6	135788619	135788872	33.07
AHI1	NM_001134831	chr6	7	135786852	135787611	35.66
AHI1	NM_001134831	chr6	8	135784163	135784544	30.89
AHI1	NM_001134831	chr6	9	135778532	135778951	34.29
AHI1	NM_001134831	chr6	10	135776772	135777164	31.04
AHI1	NM_001134831	chr6	11	135774379	135774674	29.39
AHI1	NM_001134831	chr6	12	135769328	135769713	32.12
AHI1	NM_001134831	chr6	13	135768046	135768398	33.14
AHI1	NM_001134831	chr6	14	135763620	135763952	34.83
AHI1	NM_001134831	chr6	15	135759413	135759736	33.33
AHI1	NM_001134831	chr6	16	135754065	135754494	34.88
AHI1	NM_001134831	chr6	17	135752246	135752552	32.25
AHI1	NM_001134831	chr6	18	135750920	135751238	29.47
AHI1	NM_001134831	chr6	19	135749667	135749997	33.53
AHI1	NM_001134831	chr6	20	135748205	135748545	32.26
AHI1	NM_001134831	chr6	21	135732386	135732782	35.01
AHI1	NM_001134831	chr6	22	135725989	135726215	31.72
AHI1	NM_001134831	chr6	23	135715814	135716134	35.83
AHI1	NM_001134831	chr6	24	135679170	135679425	32.81
AHI1	NM_001134831	chr6	25	135644200	135644562	40.22
AHI1	NM_001134831	chr6	26	135639557	135639854	35.23
AHI1	NM_001134831	chr6	27	135621538	135621796	33.98
AHI1	NM_001134831	chr6	28	135611461	135611763	43.23
AHI1	NM_001134831	chr6	29	135605012	135606885	34.69
AKAP9	NM_005751	chr7	1	91570089	91570561	68.92
AKAP9	NM_005751	chr7	2	91602925	91603382	35.81
AKAP9	NM_005751	chr7	3	91609503	91609747	26.12
AKAP9	NM_005751	chr7	4	91621372	91621625	28.74
AKAP9	NM_005751	chr7	5	91622099	91622469	36.39
AKAP9	NM_005751	chr7	6	91623835	91624190	26.97
AKAP9	NM_005751	chr7	7	91624817	91625214	36.18
AKAP9	NM_005751	chr7	8	91630062	91632649	32.61
AKAP9	NM_005751	chr7	9	91641643	91642056	31.88
AKAP9	NM_005751	chr7	10	91643463	91643742	36.43
AKAP9	NM_005751	chr7	11	91645343	91645681	29.5
AKAP9	NM_005751	chr7	12	91646231	91646516	29.37
AKAP9	NM_005751	chr7	13	91651452	91651766	32.38
AKAP9	NM_005751	chr7	14	91652028	91652423	32.32
AKAP9	NM_005751	chr7	15	91659109	91659405	30.64
AKAP9	NM_005751	chr7	16	91660726	91661018	29.01
AKAP9	NM_005751	chr7	17	91667633	91668186	30.32
AKAP9	NM_005751	chr7	18	91669888	91670312	35.29
AKAP9	NM_005751	chr7	19	91671260	91671600	41.94
AKAP9	NM_005751	chr7	20	91671882	91672185	31.25
AKAP9	NM_005751	chr7	21	91674222	91674627	35.71
AKAP9	NM_005751	chr7	22	91681940	91682372	34.64
AKAP9	NM_005751	chr7	23	91690474	91690836	40.77
AKAP9	NM_005751	chr7	24	91691488	91691900	34.62
AKAP9	NM_005751	chr7	25	91694445	91694877	29.79
AKAP9	NM_005751	chr7	26	91695641	91695960	33.12
AKAP9	NM_005751	chr7	27	91699244	91699620	32.36
AKAP9	NM_005751	chr7	28	91700119	91700423	28.85
AKAP9	NM_005751	chr7	29	91706069	91706421	24.65
AKAP9	NM_005751	chr7	30	91706910	91707289	31.58
AKAP9	NM_005751	chr7	31	91708293	91709566	33.12
AKAP9	NM_005751	chr7	32	91711736	91712076	32.84
AKAP9	NM_005751	chr7	33	91712384	91713069	34.84
AKAP9	NM_005751	chr7	34	91713854	91714075	28.83
AKAP9	NM_005751	chr7	35	91714077	91714354	35.61
AKAP9	NM_005751	chr7	36	91714709	91715100	33.67
AKAP9	NM_005751	chr7	37	91715442	91715830	32.13
AKAP9	NM_005751	chr7	38	91718599	91718943	34.2
AKAP9	NM_005751	chr7	39	91722311	91722730	36.9
AKAP9	NM_005751	chr7	40	91724237	91724587	36.75
AKAP9	NM_005751	chr7	41	91725903	91726771	40.85
AKAP9	NM_005751	chr7	42	91726800	91727208	38.63
AKAP9	NM_005751	chr7	43	91727323	91727628	33.33
AKAP9	NM_005751	chr7	44	91728901	91729283	39.16
AKAP9	NM_005751	chr7	45	91730070	91730470	38.15
AKAP9	NM_005751	chr7	46	91731808	91732240	42.96
AKAP9	NM_005751	chr7	47	91734892	91735177	37.06
AKAP9	NM_005751	chr7	48	91736507	91736836	33.03
AKAP9	NM_005751	chr7	49	91737708	91738047	43.53
AKAP9	NM_005751	chr7	50	91739336	91740086	31.56
ALAS2	NM_000032	chrX	1	55057275	55057597	55.73
ALAS2	NM_000032	chrX	2	55052153	55052548	51.26
ALAS2	NM_000032	chrX	3	55051051	55051373	46.44
ALAS2	NM_000032	chrX	4	55050090	55050400	49.2
ALAS2	NM_000032	chrX	5	55047385	55047807	46.57
ALAS2	NM_000032	chrX	6	55046653	55047037	52.73
ALAS2	NM_000032	chrX	7	55043819	55044198	43.68
ALAS2	NM_000032	chrX	8	55041911	55042275	50.96
ALAS2	NM_000032	chrX	9	55041080	55041548	55.86
ALAS2	NM_000032	chrX	10	55039819	55040181	53.72
ALAS2	NM_000032	chrX	11	55035389	55035876	52.05
ALDOB	NM_000035	chr9	1	104197891	104198162	39.71
ALDOB	NM_000035	chr9	2	104192958	104193279	45.65
ALDOB	NM_000035	chr9	3	104191937	104192348	53.16
ALDOB	NM_000035	chr9	4	104190651	104190905	39.22
ALDOB	NM_000035	chr9	5	104189664	104190024	49.03
ALDOB	NM_000035	chr9	6	104188737	104189020	38.03
ALDOB	NM_000035	chr9	7	104187635	104188009	49.6
ALDOB	NM_000035	chr9	8	104187025	104187424	48.75
ALDOB	NM_000035	chr9	9	104182742	104184286	37.61
ANK2	NM_001127493	chr4	1	113739139	113739520	56.02
ANK2	NM_001127493	chr4	2	113825511	113825770	25.38
ANK2	NM_001127493	chr4	3	114095472	114095773	38.74
ANK2	NM_001127493	chr4	4	114117424	114117722	41.47
ANK2	NM_001127493	chr4	5	114120067	114120365	34.11
ANK2	NM_001127493	chr4	6	114153217	114153515	36.45
ANK2	NM_001127493	chr4	7	114158043	114158428	45.08
ANK2	NM_001127493	chr4	8	114158655	114158878	34.82
ANK2	NM_001127493	chr4	9	114161541	114161839	37.79
ANK2	NM_001127493	chr4	10	114163167	114163465	44.15
ANK2	NM_001127493	chr4	11	114170820	114171118	40.47
ANK2	NM_001127493	chr4	12	114176791	114177188	44.97
ANK2	NM_001127493	chr4	13	114179106	114179386	40.57
ANK2	NM_001127493	chr4	14	114179388	114179667	49.29
ANK2	NM_001127493	chr4	15	114185953	114186251	49.83
ANK2	NM_001127493	chr4	16	114195508	114195905	47.99
ANK2	NM_001127493	chr4	17	114198893	114199191	36.79
ANK2	NM_001127493	chr4	18	114199516	114199814	44.48
ANK2	NM_001127493	chr4	19	114203731	114204128	38.44
ANK2	NM_001127493	chr4	20	114208661	114208959	41.47
ANK2	NM_001127493	chr4	21	114209444	114209742	35.45
ANK2	NM_001127493	chr4	22	114213472	114213770	55.18
ANK2	NM_001127493	chr4	23	114214496	114214794	47.83
ANK2	NM_001127493	chr4	24	114223823	114224095	38.1
ANK2	NM_001127493	chr4	25	114232311	114232655	38.26
ANK2	NM_001127493	chr4	26	114238763	114239065	47.85
ANK2	NM_001127493	chr4	27	114239573	114239876	38.16
ANK2	NM_001127493	chr4	28	114244815	114245050	42.37
ANK2	NM_001127493	chr4	29	114251302	114251726	45.65
ANK2	NM_001127493	chr4	30	114253028	114253326	48.16
ANK2	NM_001127493	chr4	31	114254110	114254464	44.23
ANK2	NM_001127493	chr4	32	114256902	114257313	46.6
ANK2	NM_001127493	chr4	33	114257633	114258037	35.56
ANK2	NM_001127493	chr4	34	114260282	114260578	36.36
ANK2	NM_001127493	chr4	35	114262744	114263172	33.1
ANK2	NM_001127493	chr4	36	114264073	114264398	32.52
ANK2	NM_001127493	chr4	37	114266956	114267278	37.15
ANK2	NM_001127493	chr4	38	114269332	114269564	40.77
ANK2	NM_001127493	chr4	39	114271284	114271505	32.88
ANK2	NM_001127493	chr4	40	114281879	114282153	44
ANK2	NM_001127493	chr4	41	114284394	114284725	37.05
ANK2	NM_001127493	chr4	42	114286095	114286438	39.83
ANK2	NM_001127493	chr4	43	114288622	114289107	39.09
ANK2	NM_001127493	chr4	44	114290570	114291061	48.17
ANK2	NM_001127493	chr4	45	114294146	114294385	39.58
ANK2	NM_001127493	chr4	46	114294387	114294705	39.81
ANK2	NM_001127493	chr4	47	114302513	114304994	39.36
APC	NM_000038	chr5	1	112073456	112073722	64.04
APC	NM_000038	chr5	2	112090470	112090822	33.99
APC	NM_000038	chr5	3	112101923	112102207	30.53
APC	NM_000038	chr5	4	112102786	112103187	32.59
APC	NM_000038	chr5	5	112111226	112111534	29.45
APC	NM_000038	chr5	6	112116387	112116700	30.57
APC	NM_000038	chr5	7	112128043	112128326	30.63
APC	NM_000038	chr5	8	112136876	112137180	34.43
APC	NM_000038	chr5	9	112151092	112151390	40.47
APC	NM_000038	chr5	10	112154563	112155141	41.8
APC	NM_000038	chr5	11	112157493	112157788	30.07
APC	NM_000038	chr5	12	112162705	112163044	32.94
APC	NM_000038	chr5	13	112163526	112163803	37.77
APC	NM_000038	chr5	14	112164453	112164769	30.6
APC	NM_000038	chr5	15	112170548	112170962	34.22
APC	NM_000038	chr5	16	112173150	112182035	38.52
ARL13B	NM_144996	chr3	1	93698882	93699426	65.5
ARL13B	NM_144996	chr3	2	93754075	93754380	27.78
ARL13B	NM_144996	chr3	3	93755296	93755698	33.75
ARL13B	NM_144996	chr3	4	93758624	93758932	38.19
ARL13B	NM_144996	chr3	5	93761759	93762184	30.52
ARL13B	NM_144996	chr3	6	93768150	93768466	31.55
ARL13B	NM_144996	chr3	7	93769568	93769836	34.94
ARL13B	NM_144996	chr3	8	93771931	93774221	28.42
ARSA	NM_000487	chr22	1	51065911	51066707	71.02
ARSA	NM_000487	chr22	2	51065539	51065909	66.58
ARSA	NM_000487	chr22	3	51065227	51065537	68.17
ARSA	NM_000487	chr22	4	51064864	51065225	61.88
ARSA	NM_000487	chr22	5	51064538	51064862	64.92
ARSA	NM_000487	chr22	6	51064238	51064536	65.55
ARSA	NM_000487	chr22	7	51063951	51064236	66.08
ARSA	NM_000487	chr22	8	51063350	51063949	62.67
ATM	NM_000051	chr11	1	108093459	108094013	63.96
ATM	NM_000051	chr11	2	108098222	108098463	28.93
ATM	NM_000051	chr11	3	108098465	108098715	27.89
ATM	NM_000051	chr11	4	108099805	108100150	30.92
ATM	NM_000051	chr11	5	108106297	108106661	32.88
ATM	NM_000051	chr11	6	108114580	108114945	28.42
ATM	NM_000051	chr11	7	108115415	108115853	33.71
ATM	NM_000051	chr11	8	108117591	108117954	33.24
ATM	NM_000051	chr11	9	108119560	108119929	34.86
ATM	NM_000051	chr11	10	108121328	108121899	36.71
ATM	NM_000051	chr11	11	108122464	108122858	36.2
ATM	NM_000051	chr11	12	108123444	108123739	30.07
ATM	NM_000051	chr11	13	108124441	108124866	34.98
ATM	NM_000051	chr11	14	108126842	108127167	29.14
ATM	NM_000051	chr11	15	108128108	108128433	34.66
ATM	NM_000051	chr11	16	108129613	108129902	29.66
ATM	NM_000051	chr11	17	108137798	108138169	38.17
ATM	NM_000051	chr11	18	108139037	108139436	36
ATM	NM_000051	chr11	19	108141691	108141925	35.32
ATM	NM_000051	chr11	20	108141927	108142233	35.5
ATM	NM_000051	chr11	21	108143159	108143391	30.9
ATM	NM_000051	chr11	22	108143393	108143679	34.49
ATM	NM_000051	chr11	23	108150118	108150435	33.33
ATM	NM_000051	chr11	24	108151622	108151995	31.55
ATM	NM_000051	chr11	25	108153337	108153706	28.92
ATM	NM_000051	chr11	26	108154854	108155300	30.65
ATM	NM_000051	chr11	27	108158227	108158542	32.91
ATM	NM_000051	chr11	28	108159604	108159930	30.28
ATM	NM_000051	chr11	29	108160229	108160628	29.75
ATM	NM_000051	chr11	30	108163246	108163620	34.13
ATM	NM_000051	chr11	31	108163940	108164304	27.12
ATM	NM_000051	chr11	32	108165554	108165886	33.03
ATM	NM_000051	chr11	33	108167914	108168209	31.76
ATM	NM_000051	chr11	34	108170341	108170712	33.6
ATM	NM_000051	chr11	35	108172275	108172616	32.46
ATM	NM_000051	chr11	36	108173480	108173856	33.16
ATM	NM_000051	chr11	37	108175302	108175679	33.33
ATM	NM_000051	chr11	38	108178524	108178811	38.54
ATM	NM_000051	chr11	39	108180787	108181142	31.18
ATM	NM_000051	chr11	40	108183038	108183325	31.6
ATM	NM_000051	chr11	41	108186450	108186688	33.05
ATM	NM_000051	chr11	42	108186690	108186940	40.24
ATM	NM_000051	chr11	43	108188000	108188348	32.95
ATM	NM_000051	chr11	44	108190581	108190885	28.85
ATM	NM_000051	chr11	45	108191928	108192247	39.06
ATM	NM_000051	chr11	46	108195937	108196371	34.25
ATM	NM_000051	chr11	47	108196685	108197052	34.24
ATM	NM_000051	chr11	48	108198272	108198585	36.31
ATM	NM_000051	chr11	49	108199648	108200065	32.3
ATM	NM_000051	chr11	50	108200841	108201248	37.99
ATM	NM_000051	chr11	51	108202071	108202384	30.57
ATM	NM_000051	chr11	52	108202506	108202864	30.36
ATM	NM_000051	chr11	53	108203389	108203727	31.86
ATM	NM_000051	chr11	54	108204513	108204795	31.1
ATM	NM_000051	chr11	55	108205596	108205936	32.84
ATM	NM_000051	chr11	56	108206472	108206788	37.85
ATM	NM_000051	chr11	57	108213849	108214198	35.14
ATM	NM_000051	chr11	58	108216370	108216735	31.97
ATM	NM_000051	chr11	59	108217906	108218192	30.31
ATM	NM_000051	chr11	60	108224393	108224707	40.95
ATM	NM_000051	chr11	61	108225438	108225701	35.98
ATM	NM_000051	chr11	62	108235709	108235998	37.24
ATM	NM_000051	chr11	63	108236000	108239926	37.94
ATP7B	NM_000053	chr13	1	52585323	52585730	63.97
ATP7B	NM_000053	chr13	2	52547971	52549404	48.81
ATP7B	NM_000053	chr13	3	52544528	52544985	46.51
ATP7B	NM_000053	chr13	4	52542480	52542843	50.27
ATP7B	NM_000053	chr13	5	52538908	52539269	41.99
ATP7B	NM_000053	chr13	6	52535873	52536149	45.85
ATP7B	NM_000053	chr13	7	52534184	52534558	47.73
ATP7B	NM_000053	chr13	8	52532347	52532780	51.38
ATP7B	NM_000053	chr13	9	52531552	52531843	45.89
ATP7B	NM_000053	chr13	10	52524354	52524635	52.13
ATP7B	NM_000053	chr13	11	52524039	52524352	42.36
ATP7B	NM_000053	chr13	12	52523698	52524037	36.76
ATP7B	NM_000053	chr13	13	52520320	52520714	55.19
ATP7B	NM_000053	chr13	14	52518145	52518527	56.92
ATP7B	NM_000053	chr13	15	52516422	52516790	56.64
ATP7B	NM_000053	chr13	16	52515117	52515460	43.31
ATP7B	NM_000053	chr13	17	52513087	52513429	52.48
ATP7B	NM_000053	chr13	18	52511572	52511915	58.72
ATP7B	NM_000053	chr13	19	52511312	52511570	54.83
ATP7B	NM_000053	chr13	20	52509629	52509931	60.4
ATP7B	NM_000053	chr13	21	52506706	52509265	49.92
AXIN2	NM_004655	chr17	1	63557468	63557840	73.46
AXIN2	NM_004655	chr17	2	63553824	63554954	52.96
AXIN2	NM_004655	chr17	3	63545538	63545878	53.08
AXIN2	NM_004655	chr17	4	63537473	63537775	48.84
AXIN2	NM_004655	chr17	5	63534139	63534561	63.83
AXIN2	NM_004655	chr17	6	63533313	63534137	64.48
AXIN2	NM_004655	chr17	7	63532831	63533311	60.5
AXIN2	NM_004655	chr17	8	63532338	63532829	55.89
AXIN2	NM_004655	chr17	9	63531644	63531939	47.3
AXIN2	NM_004655	chr17	10	63529930	63530297	48.64
AXIN2	NM_004655	chr17	11	63524585	63526320	42.74
BARD1	NM_000465	chr2	1	215674036	215674528	68.76
BARD1	NM_000465	chr2	2	215661685	215661941	33.07
BARD1	NM_000465	chr2	3	215656921	215657269	32.95
BARD1	NM_000465	chr2	4	215645184	215646333	38.35
BARD1	NM_000465	chr2	5	215633856	215634136	32.03
BARD1	NM_000465	chr2	6	215632106	215632478	36.19
BARD1	NM_000465	chr2	7	215617071	215617379	31.07
BARD1	NM_000465	chr2	8	215610346	215610678	35.44
BARD1	NM_000465	chr2	9	215609691	215609983	31.4
BARD1	NM_000465	chr2	10	215595035	215595332	35.57
BARD1	NM_000465	chr2	11	215593175	215593832	38.3
BCKDHA	NM_000709	chr19	1	41903604	41903940	57.57
BCKDHA	NM_000709	chr19	2	41916442	41916774	63.36
BCKDHA	NM_000709	chr19	3	41916776	41917014	58.16
BCKDHA	NM_000709	chr19	4	41919854	41920162	56.96
BCKDHA	NM_000709	chr19	5	41924940	41925301	58.56
BCKDHA	NM_000709	chr19	6	41927969	41928375	62.9
BCKDHA	NM_000709	chr19	7	41928434	41928775	59.36
BCKDHA	NM_000709	chr19	8	41928803	41929174	63.17
BCKDHA	NM_000709	chr19	9	41930243	41931009	59.84
BCKDHB	NM_183050	chr6	1	80816244	80816706	69.76
BCKDHB	NM_183050	chr6	2	80837164	80837441	33.81
BCKDHB	NM_183050	chr6	3	80838778	80839046	25.28
BCKDHB	NM_183050	chr6	4	80877295	80877628	34.73
BCKDHB	NM_183050	chr6	5	80878492	80878847	43.82
BCKDHB	NM_183050	chr6	6	80880899	80881207	28.16
BCKDHB	NM_183050	chr6	7	80910551	80910848	38.26
BCKDHB	NM_183050	chr6	8	80912719	80913029	35.69
BCKDHB	NM_183050	chr6	9	80982752	80983038	33.8
BCKDHB	NM_183050	chr6	10	81053281	81056087	35.45
BLM	NM_000057	chr15	1	91260479	91260771	66.89
BLM	NM_000057	chr15	2	91290519	91290820	37.09
BLM	NM_000057	chr15	3	91292497	91293397	36.07
BLM	NM_000057	chr15	4	91294917	91295276	30.83
BLM	NM_000057	chr15	5	91297941	91298268	34.45
BLM	NM_000057	chr15	6	91303277	91303609	37.54
BLM	NM_000057	chr15	7	91303724	91304585	37.35
BLM	NM_000057	chr15	8	91306096	91306487	36.48
BLM	NM_000057	chr15	9	91308426	91308744	35.42
BLM	NM_000057	chr15	10	91310040	91310353	25.16
BLM	NM_000057	chr15	11	91312263	91312561	36.45
BLM	NM_000057	chr15	12	91312568	91312916	44.99
BLM	NM_000057	chr15	13	91325952	91326258	33.55
BLM	NM_000057	chr15	14	91328051	91328411	37.4
BLM	NM_000057	chr15	15	91333779	91334174	39.39
BLM	NM_000057	chr15	16	91337297	91337687	28.13
BLM	NM_000057	chr15	17	91341320	91341667	28.74
BLM	NM_000057	chr15	18	91346651	91347050	34.25
BLM	NM_000057	chr15	19	91347297	91347689	38.17
BLM	NM_000057	chr15	20	91352267	91352589	40.56
BLM	NM_000057	chr15	21	91354335	91354736	46.02
BLM	NM_000057	chr15	22	91358232	91358784	39.96
BRCA1	NM_007294	chr17	1	41277188	41277600	56.42
BRCA1	NM_007294	chr17	2	41275934	41276232	29.43
BRCA1	NM_007294	chr17	3	41267643	41267896	34.65
BRCA1	NM_007294	chr17	4	41258373	41258650	31.29
BRCA1	NM_007294	chr17	5	41256785	41257073	34.26
BRCA1	NM_007294	chr17	6	41256039	41256378	34.12
BRCA1	NM_007294	chr17	7	41251692	41251997	38.56
BRCA1	NM_007294	chr17	8	41249161	41249406	26.42
BRCA1	NM_007294	chr17	9	41247763	41248039	37.91
BRCA1	NM_007294	chr17	10	41243352	41246977	38.72
BRCA1	NM_007294	chr17	11	41242861	41243149	43.25
BRCA1	NM_007294	chr17	12	41234321	41234692	39.25
BRCA1	NM_007294	chr17	13	41228405	41228731	33.03
BRCA1	NM_007294	chr17	14	41226248	41226638	40.92
BRCA1	NM_007294	chr17	15	41222845	41223355	41.68
BRCA1	NM_007294	chr17	16	41219525	41219812	40.28
BRCA1	NM_007294	chr17	17	41215791	41216068	38.49
BRCA1	NM_007294	chr17	18	41215250	41215490	37.34
BRCA1	NM_007294	chr17	19	41208969	41209252	45.77
BRCA1	NM_007294	chr17	20	41202980	41203234	45.1
BRCA1	NM_007294	chr17	21	41201038	41201311	48.18
BRCA1	NM_007294	chr17	22	41199560	41199820	46.74
BRCA1	NM_007294	chr17	23	41196213	41197919	44.29
BRCA2	NM_000059	chr13	1	32889517	32889904	67.27
BRCA2	NM_000059	chr13	2	32890459	32890764	35.29
BRCA2	NM_000059	chr13	3	32893114	32893562	34.52
BRCA2	NM_000059	chr13	4	32899113	32899421	29.77
BRCA2	NM_000059	chr13	5	32900138	32900333	26.02
BRCA2	NM_000059	chr13	6	32900335	32900519	31.89
BRCA2	NM_000059	chr13	7	32900536	32900850	33.33
BRCA2	NM_000059	chr13	8	32903480	32903729	26.8
BRCA2	NM_000059	chr13	9	32904956	32905267	34.94
BRCA2	NM_000059	chr13	10	32906309	32907624	33.59
BRCA2	NM_000059	chr13	11	32910302	32915433	33.44
BRCA2	NM_000059	chr13	12	32918595	32918890	30.07
BRCA2	NM_000059	chr13	13	32920864	32921133	27.04
BRCA2	NM_000059	chr13	14	32928898	32929525	34.39
BRCA2	NM_000059	chr13	15	32930465	32930846	39.01
BRCA2	NM_000059	chr13	16	32931779	32932166	32.73
BRCA2	NM_000059	chr13	17	32936560	32936930	36.66
BRCA2	NM_000059	chr13	18	32937216	32937770	35.5
BRCA2	NM_000059	chr13	19	32944439	32944794	34.83
BRCA2	NM_000059	chr13	20	32944993	32945337	33.04
BRCA2	NM_000059	chr13	21	32950707	32951028	37.89
BRCA2	NM_000059	chr13	22	32953354	32953752	31.58
BRCA2	NM_000059	chr13	23	32953787	32954097	30.55
BRCA2	NM_000059	chr13	24	32954099	32954382	32.39
BRCA2	NM_000059	chr13	25	32968726	32969170	34.38
BRCA2	NM_000059	chr13	26	32970935	32971281	34.58
BRCA2	NM_000059	chr13	27	32972199	32973909	34.89
BRIP1	NM_032043	chr17	1	59940545	59940855	58.84
BRIP1	NM_032043	chr17	2	59938708	59939030	33.44
BRIP1	NM_032043	chr17	3	59937057	59937368	36.54
BRIP1	NM_032043	chr17	4	59934319	59934692	34.76
BRIP1	NM_032043	chr17	5	59926390	59926717	35.06
BRIP1	NM_032043	chr17	6	59924362	59924681	33.75
BRIP1	NM_032043	chr17	7	59885728	59886218	37.68
BRIP1	NM_032043	chr17	8	59878514	59878935	34.36
BRIP1	NM_032043	chr17	9	59876361	59876760	33.75
BRIP1	NM_032043	chr17	10	59870858	59871190	33.33
BRIP1	NM_032043	chr17	11	59861531	59861885	32.39
BRIP1	NM_032043	chr17	12	59858101	59858466	32.79
BRIP1	NM_032043	chr17	13	59857522	59857862	36.36
BRIP1	NM_032043	chr17	14	59853662	59854023	36.19
BRIP1	NM_032043	chr17	15	59821693	59822052	30.83
BRIP1	NM_032043	chr17	16	59820274	59820595	34.78
BRIP1	NM_032043	chr17	17	59793212	59793524	29.39
BRIP1	NM_032043	chr17	18	59770691	59770973	32.51
BRIP1	NM_032043	chr17	19	59763097	59763626	33.96
BRIP1	NM_032043	chr17	20	59759885	59761601	36.05
BTD	NM_000060	chr3	1	15643155	15643501	63.11
BTD	NM_000060	chr3	2	15676831	15677295	49.89
BTD	NM_000060	chr3	3	15683315	15683664	44
BTD	NM_000060	chr3	4	15685723	15687424	47.77
CACNA1C	NM_001129843	chr12	1	2162316	2162877	61.57
CACNA1C	NM_001129843	chr12	2	2224290	2224811	61.3
CACNA1C	NM_001129843	chr12	3	2229391	2229696	37.91
CACNA1C	NM_001129843	chr12	4	2558042	2558381	42.06
CACNA1C	NM_001129843	chr12	5	2566633	2566972	53.82
CACNA1C	NM_001129843	chr12	6	2595170	2595528	58.77
CACNA1C	NM_001129843	chr12	7	2602256	2602652	58.94
CACNA1C	NM_001129843	chr12	8	2613908	2614211	47.37
CACNA1C	NM_001129843	chr12	9	2621878	2622250	55.76
CACNA1C	NM_001129843	chr12	10	2659009	2659299	58.76
CACNA1C	NM_001129843	chr12	11	2666017	2666243	48.02
CACNA1C	NM_001129843	chr12	12	2675488	2675848	58.45
CACNA1C	NM_001129843	chr12	13	2676635	2677060	57.98
CACNA1C	NM_001129843	chr12	14	2690656	2691063	57.11
CACNA1C	NM_001129843	chr12	15	2691888	2692208	56.07
CACNA1C	NM_001129843	chr12	16	2693569	2693883	55.24
CACNA1C	NM_001129843	chr12	17	2694442	2694762	58.26
CACNA1C	NM_001129843	chr12	18	2694901	2695170	48.89
CACNA1C	NM_001129843	chr12	19	2702279	2702611	51.35
CACNA1C	NM_001129843	chr12	20	2704940	2705269	57.27
CACNA1C	NM_001129843	chr12	21	2706503	2706762	43.46
CACNA1C	NM_001129843	chr12	22	2710920	2711226	60.59
CACNA1C	NM_001129843	chr12	23	2714147	2714434	56.6
CACNA1C	NM_001129843	chr12	24	2714745	2715052	57.47
CACNA1C	NM_001129843	chr12	25	2715677	2715929	52.96
CACNA1C	NM_001129843	chr12	26	2716050	2716396	55.91
CACNA1C	NM_001129843	chr12	27	2717577	2717978	59.95
CACNA1C	NM_001129843	chr12	28	2719607	2719965	58.77
CACNA1C	NM_001129843	chr12	29	2720969	2721279	57.23
CACNA1C	NM_001129843	chr12	30	2743363	2743646	42.61
CACNA1C	NM_001129843	chr12	31	2757541	2757773	55.79
CACNA1C	NM_001129843	chr12	32	2760706	2761034	63.53
CACNA1C	NM_001129843	chr12	33	2762901	2763166	63.53
CACNA1C	NM_001129843	chr12	34	2764213	2764504	52.05
CACNA1C	NM_001129843	chr12	35	2773891	2774256	59.84
CACNA1C	NM_001129843	chr12	36	2774647	2774974	52.74
CACNA1C	NM_001129843	chr12	37	2775752	2776048	55.56
CACNA1C	NM_001129843	chr12	38	2777999	2778301	57.43
CACNA1C	NM_001129843	chr12	39	2783607	2783908	62.91
CACNA1C	NM_001129843	chr12	40	2786160	2786487	56.4
CACNA1C	NM_001129843	chr12	41	2786799	2787133	61.49
CACNA1C	NM_001129843	chr12	42	2788510	2789062	66.73
CACNA1C	NM_001129843	chr12	43	2791616	2791944	55.62
CACNA1C	NM_001129843	chr12	44	2794802	2795108	56.68
CACNA1C	NM_001129843	chr12	45	2795232	2795535	57.24
CACNA1C	NM_001129843	chr12	46	2797513	2798045	65.67
CACNA1C	NM_001129843	chr12	47	2799966	2807215	49.06
CACNB2	NM_201593	chr10	1	18429506	18429885	73.16
CACNB2	NM_201593	chr10	2	18439712	18440004	31.06
CACNB2	NM_201593	chr10	3	18690753	18691072	48.75
CACNB2	NM_201593	chr10	4	18787184	18787506	40.25
CACNB2	NM_201593	chr10	5	18789641	18789977	37.69
CACNB2	NM_201593	chr10	6	18795300	18795576	33.21
CACNB2	NM_201593	chr10	7	18803340	18803559	40.45
CACNB2	NM_201593	chr10	8	18807165	18807445	48.04
CACNB2	NM_201593	chr10	9	18807739	18807997	37.07
CACNB2	NM_201593	chr10	10	18816417	18816726	40
CACNB2	NM_201593	chr10	11	18822905	18823256	35.51
CACNB2	NM_201593	chr10	12	18824930	18825225	35.47
CACNB2	NM_201593	chr10	13	18827009	18827394	51.81
CACNB2	NM_201593	chr10	14	18828059	18830788	42.64
CAV3	NM_033337	chr3	1	8775396	8775776	58.01
CAV3	NM_033337	chr3	2	8787112	8788550	54.9
CC2D2A	NM_001080522	chr4	1	15471389	15471781	48.85
CC2D2A	NM_001080522	chr4	2	15474746	15474979	36.75
CC2D2A	NM_001080522	chr4	3	15477439	15477695	40.47
CC2D2A	NM_001080522	chr4	4	15480247	15480530	42.61
CC2D2A	NM_001080522	chr4	5	15482228	15482551	53.09
CC2D2A	NM_001080522	chr4	6	15503952	15504240	37.72
CC2D2A	NM_001080522	chr4	7	15504345	15504646	41.06
CC2D2A	NM_001080522	chr4	8	15511662	15511963	40.07
CC2D2A	NM_001080522	chr4	9	15512770	15513146	45.89
CC2D2A	NM_001080522	chr4	10	15516230	15516592	38.84
CC2D2A	NM_001080522	chr4	11	15517391	15517727	43.03
CC2D2A	NM_001080522	chr4	12	15518148	15518479	39.46
CC2D2A	NM_001080522	chr4	13	15528970	15529379	41.22
CC2D2A	NM_001080522	chr4	14	15530143	15530449	39.09
CC2D2A	NM_001080522	chr4	15	15534716	15535056	28.15
CC2D2A	NM_001080522	chr4	16	15538443	15538799	44.26
CC2D2A	NM_001080522	chr4	17	15539422	15539860	53.76
CC2D2A	NM_001080522	chr4	18	15542360	15542737	45.5
CC2D2A	NM_001080522	chr4	19	15552347	15552703	41.46
CC2D2A	NM_001080522	chr4	20	15554681	15555028	43.97
CC2D2A	NM_001080522	chr4	21	15556595	15556933	43.66
CC2D2A	NM_001080522	chr4	22	15558827	15559230	36.39
CC2D2A	NM_001080522	chr4	23	15560688	15560980	36.52
CC2D2A	NM_001080522	chr4	24	15562054	15562345	27.74
CC2D2A	NM_001080522	chr4	25	15564878	15565245	50.54
CC2D2A	NM_001080522	chr4	26	15568900	15569202	42.57
CC2D2A	NM_001080522	chr4	27	15569204	15569509	35.62
CC2D2A	NM_001080522	chr4	28	15570816	15571112	39.06
CC2D2A	NM_001080522	chr4	29	15571921	15572219	41.81
CC2D2A	NM_001080522	chr4	30	15575673	15576049	38.73
CC2D2A	NM_001080522	chr4	31	15581491	15581894	35.4
CC2D2A	NM_001080522	chr4	32	15587680	15587969	34.48
CC2D2A	NM_001080522	chr4	33	15589339	15589652	39.49
CC2D2A	NM_001080522	chr4	34	15591068	15591402	32.84
CC2D2A	NM_001080522	chr4	35	15597608	15597930	35.91
CC2D2A	NM_001080522	chr4	36	15598930	15599188	35.52
CC2D2A	NM_001080522	chr4	37	15601052	15601429	38.36
CC2D2A	NM_001080522	chr4	38	15602760	15603280	33.59
CDC73	NM_024529	chr1	1	193090988	193091561	67.07
CDC73	NM_024529	chr1	2	193094142	193094447	35.95
CDC73	NM_024529	chr1	3	193099204	193099473	29.63
CDC73	NM_024529	chr1	4	193104421	193104625	32.68
CDC73	NM_024529	chr1	5	193104627	193104819	30.57
CDC73	NM_024529	chr1	6	193107115	193107403	33.91
CDC73	NM_024529	chr1	7	193110880	193111296	35.49
CDC73	NM_024529	chr1	8	193116897	193117195	33.78
CDC73	NM_024529	chr1	9	193119334	193119612	40.5
CDC73	NM_024529	chr1	10	193121410	193121674	31.7
CDC73	NM_024529	chr1	11	193172825	193173082	33.72
CDC73	NM_024529	chr1	12	193181095	193181330	31.78
CDC73	NM_024529	chr1	13	193181420	193181707	27.78
CDC73	NM_024529	chr1	14	193202023	193202384	35.36
CDC73	NM_024529	chr1	15	193205286	193205586	41.53
CDC73	NM_024529	chr1	16	193218760	193219101	33.04
CDC73	NM_024529	chr1	17	193219706	193224040	29.02
CDH1	NM_004360	chr16	1	68771095	68771466	70.7
CDH1	NM_004360	chr16	2	68772100	68772414	68.25
CDH1	NM_004360	chr16	3	68835473	68835896	48.11
CDH1	NM_004360	chr16	4	68842227	68842533	46.91
CDH1	NM_004360	chr16	5	68842535	68842851	44.48
CDH1	NM_004360	chr16	6	68844000	68844344	49.57
CDH1	NM_004360	chr16	7	68845487	68845862	50.53
CDH1	NM_004360	chr16	8	68845938	68846266	47.42
CDH1	NM_004360	chr16	9	68847116	68847498	46.48
CDH1	NM_004360	chr16	10	68849318	68849762	40.67
CDH1	NM_004360	chr16	11	68853083	68853428	49.13
CDH1	NM_004360	chr16	12	68855804	68856228	47.53
CDH1	NM_004360	chr16	13	68857202	68857629	42.99
CDH1	NM_004360	chr16	14	68861977	68862307	49.85
CDH1	NM_004360	chr16	15	68863457	68863800	44.77
CDH1	NM_004360	chr16	16	68867093	68869544	43.72
CDH23	NM_022124	chr10	1	73156604	73157175	76.75
CDH23	NM_022124	chr10	2	73199484	73199755	61.76
CDH23	NM_022124	chr10	3	73205975	73206252	57.55
CDH23	NM_022124	chr10	4	73269739	73270081	58.6
CDH23	NM_022124	chr10	5	73270611	73270817	61.84
CDH23	NM_022124	chr10	6	73270819	73271069	58.57
CDH23	NM_022124	chr10	7	73326399	73326793	61.27
CDH23	NM_022124	chr10	8	73330447	73330775	54.41
CDH23	NM_022124	chr10	9	73337571	73337849	58.78
CDH23	NM_022124	chr10	10	73375161	73375473	62.94
CDH23	NM_022124	chr10	11	73376862	73377250	54.5
CDH23	NM_022124	chr10	12	73405482	73405837	57.58
CDH23	NM_022124	chr10	13	73406116	73406474	58.22
CDH23	NM_022124	chr10	14	73434769	73435033	58.11
CDH23	NM_022124	chr10	15	73437113	73437550	56.39
CDH23	NM_022124	chr10	16	73439044	73439349	61.44
CDH23	NM_022124	chr10	17	73442102	73442429	56.4
CDH23	NM_022124	chr10	18	73447304	73447576	61.54
CDH23	NM_022124	chr10	19	73450125	73450441	65.3
CDH23	NM_022124	chr10	20	73453804	73454116	62.62
CDH23	NM_022124	chr10	21	73455075	73455382	61.69
CDH23	NM_022124	chr10	22	73461679	73462068	64.87
CDH23	NM_022124	chr10	23	73462206	73462551	57.8
CDH23	NM_022124	chr10	24	73464568	73464987	66.19
CDH23	NM_022124	chr10	25	73466554	73466906	64.87
CDH23	NM_022124	chr10	26	73468755	73469068	62.74
CDH23	NM_022124	chr10	27	73472322	73472670	63.32
CDH23	NM_022124	chr10	28	73483702	73483962	57.47
CDH23	NM_022124	chr10	29	73485029	73485377	65.04
CDH23	NM_022124	chr10	30	73490126	73490461	62.5
CDH23	NM_022124	chr10	31	73491644	73492232	56.54
CDH23	NM_022124	chr10	32	73493897	73494198	60.26
CDH23	NM_022124	chr10	33	73498152	73498504	62.61
CDH23	NM_022124	chr10	34	73499301	73499629	61.4
CDH23	NM_022124	chr10	35	73500479	73500807	58.36
CDH23	NM_022124	chr10	36	73501351	73501778	62.85
CDH23	NM_022124	chr10	37	73537337	73537758	57.11
CDH23	NM_022124	chr10	38	73537846	73538165	59.06
CDH23	NM_022124	chr10	39	73538924	73539304	57.48
CDH23	NM_022124	chr10	40	73543944	73544277	60.18
CDH23	NM_022124	chr10	41	73544548	73544957	60.73
CDH23	NM_022124	chr10	42	73545288	73545595	58.44
CDH23	NM_022124	chr10	43	73548597	73548899	58.42
CDH23	NM_022124	chr10	44	73549945	73550270	64.42
CDH23	NM_022124	chr10	45	73550789	73551192	62.38
CDH23	NM_022124	chr10	46	73552839	73553497	55.99
CDH23	NM_022124	chr10	47	73556761	73557077	57.41
CDH23	NM_022124	chr10	48	73558011	73558435	60
CDH23	NM_022124	chr10	49	73558768	73559137	59.73
CDH23	NM_022124	chr10	50	73559149	73559486	55.92
CDH23	NM_022124	chr10	51	73560293	73560612	53.12
CDH23	NM_022124	chr10	52	73562555	73562899	60
CDH23	NM_022124	chr10	53	73562901	73563277	59.68
CDH23	NM_022124	chr10	54	73565463	73565839	64.46
CDH23	NM_022124	chr10	55	73565841	73566138	59.06
CDH23	NM_022124	chr10	56	73566934	73567218	61.4
CDH23	NM_022124	chr10	57	73567220	73567563	63.37
CDH23	NM_022124	chr10	58	73567565	73567864	60
CDH23	NM_022124	chr10	59	73569477	73569933	62.36
CDH23	NM_022124	chr10	60	73570129	73570426	59.06
CDH23	NM_022124	chr10	61	73570972	73571230	61.78
CDH23	NM_022124	chr10	62	73571232	73571408	63.84
CDH23	NM_022124	chr10	63	73571410	73571610	63.68
CDH23	NM_022124	chr10	64	73571612	73571872	65.13
CDH23	NM_022124	chr10	65	73572137	73572445	63.43
CDH23	NM_022124	chr10	66	73572447	73572747	59.47
CDH23	NM_022124	chr10	67	73572901	73573205	61.97
CDH23	NM_022124	chr10	68	73574609	73575802	57.71
CEP290	NM_025114	chr12	1	88535577	88536093	59.96
CEP290	NM_025114	chr12	2	88534898	88535211	30.25
CEP290	NM_025114	chr12	3	88534633	88534896	29.17
CEP290	NM_025114	chr12	4	88533122	88533441	25.94
CEP290	NM_025114	chr12	5	88532822	88533120	21.74
CEP290	NM_025114	chr12	6	88530320	88530663	30.23
CEP290	NM_025114	chr12	7	88524842	88525095	29.53
CEP290	NM_025114	chr12	8	88524261	88524442	28.57
CEP290	NM_025114	chr12	9	88523851	88524259	30.81
CEP290	NM_025114	chr12	10	88523371	88523849	25.89
CEP290	NM_025114	chr12	11	88522623	88522912	25.86
CEP290	NM_025114	chr12	12	88519993	88520315	29.72
CEP290	NM_025114	chr12	13	88518923	88519246	25
CEP290	NM_025114	chr12	14	88514674	88515043	35.14
CEP290	NM_025114	chr12	15	88513791	88514153	25.9
CEP290	NM_025114	chr12	16	88512385	88512620	32.63
CEP290	NM_025114	chr12	17	88512160	88512383	29.91
CEP290	NM_025114	chr12	18	88510710	88511022	31.95
CEP290	NM_025114	chr12	19	88508775	88509059	27.02
CEP290	NM_025114	chr12	20	88508097	88508439	30.9
CEP290	NM_025114	chr12	21	88505301	88505735	28.74
CEP290	NM_025114	chr12	22	88504879	88505299	29.69
CEP290	NM_025114	chr12	23	88502743	88503058	25.32
CEP290	NM_025114	chr12	24	88500729	88500975	25.51
CEP290	NM_025114	chr12	25	88500352	88500727	31.91
CEP290	NM_025114	chr12	26	88496515	88496888	34.76
CEP290	NM_025114	chr12	27	88490565	88490876	27.88
CEP290	NM_025114	chr12	28	88487447	88487852	30.05
CEP290	NM_025114	chr12	29	88486358	88486709	33.24
CEP290	NM_025114	chr12	30	88484405	88484716	34.94
CEP290	NM_025114	chr12	31	88482709	88483364	36.59
CEP290	NM_025114	chr12	32	88481457	88481821	27.95
CEP290	NM_025114	chr12	33	88480061	88480375	33.65
CEP290	NM_025114	chr12	34	88479716	88480059	32.56
CEP290	NM_025114	chr12	35	88478263	88478729	31.05
CEP290	NM_025114	chr12	36	88477524	88477831	29.87
CEP290	NM_025114	chr12	37	88476708	88477107	31.25
CEP290	NM_025114	chr12	38	88473859	88474272	34.78
CEP290	NM_025114	chr12	39	88472769	88473106	31.36
CEP290	NM_025114	chr12	40	88471299	88471795	25.35
CEP290	NM_025114	chr12	41	88470899	88471297	29.57
CEP290	NM_025114	chr12	42	88465394	88465803	26.59
CEP290	NM_025114	chr12	43	88464971	88465392	31.75
CEP290	NM_025114	chr12	44	88462199	88462522	29.63
CEP290	NM_025114	chr12	45	88457658	88457992	28.36
CEP290	NM_025114	chr12	46	88456369	88456655	33.45
CEP290	NM_025114	chr12	47	88454507	88454871	27.4
CEP290	NM_025114	chr12	48	88453575	88453897	28.79
CEP290	NM_025114	chr12	49	88452525	88452897	32.71
CEP290	NM_025114	chr12	50	88449253	88449594	27.78
CEP290	NM_025114	chr12	51	88448017	88448290	30.29
CEP290	NM_025114	chr12	52	88447329	88447623	33.22
CEP290	NM_025114	chr12	53	88444031	88444310	29.64
CEP290	NM_025114	chr12	54	88442691	88443291	28.45
CFTR	NM_000492	chr7	1	117119917	117120301	56.88
CFTR	NM_000492	chr7	2	117144207	117144517	32.15
CFTR	NM_000492	chr7	3	117148988	117149296	32.04
CFTR	NM_000492	chr7	4	117170853	117171268	38.46
CFTR	NM_000492	chr7	5	117174230	117174519	27.93
CFTR	NM_000492	chr7	6	117175202	117175565	41.21
CFTR	NM_000492	chr7	7	117176502	117176827	29.45
CFTR	NM_000492	chr7	8	117180054	117180500	37.14
CFTR	NM_000492	chr7	9	117181970	117182262	29.69
CFTR	NM_000492	chr7	10	117188595	117188977	34.2
CFTR	NM_000492	chr7	11	117199418	117199809	35.71
CFTR	NM_000492	chr7	12	117227693	117227987	33.22
CFTR	NM_000492	chr7	13	117230307	117230593	29.97
CFTR	NM_000492	chr7	14	117231888	117232811	37.88
CFTR	NM_000492	chr7	15	117234884	117235212	29.79
CFTR	NM_000492	chr7	16	117242780	117243017	36.97
CFTR	NM_000492	chr7	17	117243486	117243936	39.25
CFTR	NM_000492	chr7	18	117246628	117246907	28.21
CFTR	NM_000492	chr7	19	117250473	117250823	33.05
CFTR	NM_000492	chr7	20	117251535	117251962	32.71
CFTR	NM_000492	chr7	21	117254567	117254867	35.22
CFTR	NM_000492	chr7	22	117267476	117267924	37.86
CFTR	NM_000492	chr7	23	117282392	117282747	36.52
CFTR	NM_000492	chr7	24	117292796	117293085	30
CFTR	NM_000492	chr7	25	117304642	117305014	43.16
CFTR	NM_000492	chr7	26	117305413	117305718	31.37
CFTR	NM_000492	chr7	27	117306862	117308816	40.05
CHEK2	NM_007194	chr22	1	29137657	29137922	58.65
CHEK2	NM_007194	chr22	2	29130291	29130815	48.76
CHEK2	NM_007194	chr22	3	29121173	29121455	36.04
CHEK2	NM_007194	chr22	4	29120865	29121171	33.88
CHEK2	NM_007194	chr22	5	29115283	29115573	28.18
CHEK2	NM_007194	chr22	6	29107797	29108105	37.86
CHEK2	NM_007194	chr22	7	29105894	29106147	28.35
CHEK2	NM_007194	chr22	8	29099393	29099654	38.93
CHEK2	NM_007194	chr22	9	29095726	29096025	43.33
CHEK2	NM_007194	chr22	10	29092789	29093075	38.33
CHEK2	NM_007194	chr22	11	29091598	29091961	42.58
CHEK2	NM_007194	chr22	12	29091015	29091330	38.92
CHEK2	NM_007194	chr22	13	29089920	29090205	45.1
CHEK2	NM_007194	chr22	14	29085023	29085303	40.93
CHEK2	NM_007194	chr22	15	29083631	29084074	40.09
CHM	NM_000390	chrX	1	85302388	85302666	47.67
CHM	NM_000390	chrX	2	85282395	85282661	32.58
CHM	NM_000390	chrX	3	85236641	85236913	33.33
CHM	NM_000390	chrX	4	85233671	85233995	34.77
CHM	NM_000390	chrX	5	85218570	85219157	37.93
CHM	NM_000390	chrX	6	85213766	85214082	29.65
CHM	NM_000390	chrX	7	85212760	85213080	28.66
CHM	NM_000390	chrX	8	85211058	85211483	35.92
CHM	NM_000390	chrX	9	85166166	85166443	25.9
CHM	NM_000390	chrX	10	85155903	85156293	36.06
CHM	NM_000390	chrX	11	85155551	85155901	35.61
CHM	NM_000390	chrX	12	85149093	85149389	35.69
CHM	NM_000390	chrX	13	85133870	85134168	31.1
CHM	NM_000390	chrX	14	85127957	85128317	35.46
CHM	NM_000390	chrX	15	85116086	85119926	34.76
COL1A1	NM_000088	chr17	1	48278672	48279100	62.47
COL1A1	NM_000088	chr17	2	48277034	48277408	65.87
COL1A1	NM_000088	chr17	3	48276867	48277032	63.25
COL1A1	NM_000088	chr17	4	48276735	48276865	63.36
COL1A1	NM_000088	chr17	5	48276487	48276733	60.32
COL1A1	NM_000088	chr17	6	48275682	48275965	51.76
COL1A1	NM_000088	chr17	7	48275444	48275680	56.12
COL1A1	NM_000088	chr17	8	48275230	48275442	50.23
COL1A1	NM_000088	chr17	9	48274993	48275228	50.42
COL1A1	NM_000088	chr17	10	48274484	48274694	58.77
COL1A1	NM_000088	chr17	11	48274203	48274482	53.57
COL1A1	NM_000088	chr17	12	48273935	48274201	51.69
COL1A1	NM_000088	chr17	13	48273788	48273933	55.48
COL1A1	NM_000088	chr17	14	48273619	48273786	64.29
COL1A1	NM_000088	chr17	15	48273428	48273617	61.58
COL1A1	NM_000088	chr17	16	48273157	48273426	58.52
COL1A1	NM_000088	chr17	17	48272885	48273155	59.78
COL1A1	NM_000088	chr17	18	48272745	48272883	58.27
COL1A1	NM_000088	chr17	19	48272529	48272743	66.98
COL1A1	NM_000088	chr17	20	48272300	48272527	61.84
COL1A1	NM_000088	chr17	21	48272036	48272298	69.58
COL1A1	NM_000088	chr17	22	48271873	48272034	64.2
COL1A1	NM_000088	chr17	23	48271629	48271871	62.14
COL1A1	NM_000088	chr17	24	48271448	48271627	61.11
COL1A1	NM_000088	chr17	25	48271204	48271446	61.32
COL1A1	NM_000088	chr17	26	48270285	48270508	59.38
COL1A1	NM_000088	chr17	27	48270108	48270283	63.64
COL1A1	NM_000088	chr17	28	48269947	48270106	63.12
COL1A1	NM_000088	chr17	29	48269736	48269945	58.1
COL1A1	NM_000088	chr17	30	48269296	48269485	61.05
COL1A1	NM_000088	chr17	31	48269002	48269294	65.53
COL1A1	NM_000088	chr17	32	48268644	48269000	58.26
COL1A1	NM_000088	chr17	33	48268069	48268385	59.62
COL1A1	NM_000088	chr17	34	48267824	48268067	61.07
COL1A1	NM_000088	chr17	35	48267580	48267822	61.73
COL1A1	NM_000088	chr17	36	48267319	48267578	64.23
COL1A1	NM_000088	chr17	37	48267158	48267317	63.75
COL1A1	NM_000088	chr17	38	48266971	48267156	60.75
COL1A1	NM_000088	chr17	39	48266689	48266969	63.7
COL1A1	NM_000088	chr17	40	48266452	48266687	62.71
COL1A1	NM_000088	chr17	41	48266212	48266450	60.25
COL1A1	NM_000088	chr17	42	48266052	48266210	61.01
COL1A1	NM_000088	chr17	43	48265702	48266050	62.46
COL1A1	NM_000088	chr17	44	48265402	48265700	62.88
COL1A1	NM_000088	chr17	45	48265069	48265400	59.34
COL1A1	NM_000088	chr17	46	48264666	48265067	56.97
COL1A1	NM_000088	chr17	47	48264331	48264664	63.77
COL1A1	NM_000088	chr17	48	48263936	48264329	63.45
COL1A1	NM_000088	chr17	49	48263531	48263934	57.18
COL1A1	NM_000088	chr17	50	48263076	48263529	63.44
COL1A1	NM_000088	chr17	51	48261359	48263074	51.98
COL1A2	NM_000089	chr7	1	94023773	94024513	58.03
COL1A2	NM_000089	chr7	2	94026960	94027170	27.96
COL1A2	NM_000089	chr7	3	94027594	94027808	23.72
COL1A2	NM_000089	chr7	4	94028261	94028496	35.59
COL1A2	NM_000089	chr7	5	94029408	94029700	45.73
COL1A2	NM_000089	chr7	6	94030779	94031032	28.35
COL1A2	NM_000089	chr7	7	94033768	94033958	45.55
COL1A2	NM_000089	chr7	8	94033960	94034104	40.69
COL1A2	NM_000089	chr7	9	94034106	94034304	39.7
COL1A2	NM_000089	chr7	10	94034411	94034664	39.76
COL1A2	NM_000089	chr7	11	94034885	94035138	36.22
COL1A2	NM_000089	chr7	12	94035462	94035715	35.83
COL1A2	NM_000089	chr7	13	94037059	94037303	32.24
COL1A2	NM_000089	chr7	14	94037395	94037598	40.2
COL1A2	NM_000089	chr7	15	94037600	94037792	46.11
COL1A2	NM_000089	chr7	16	94037982	94038235	42.13
COL1A2	NM_000089	chr7	17	94038534	94038804	43.54
COL1A2	NM_000089	chr7	18	94038806	94038977	42.44
COL1A2	NM_000089	chr7	19	94038979	94039233	53.33
COL1A2	NM_000089	chr7	20	94039454	94039669	42.13
COL1A2	NM_000089	chr7	21	94039671	94039939	47.96
COL1A2	NM_000089	chr7	22	94040101	94040311	45.02
COL1A2	NM_000089	chr7	23	94040313	94040566	44.09
COL1A2	NM_000089	chr7	24	94041280	94041533	37.01
COL1A2	NM_000089	chr7	25	94041796	94042094	48.16
COL1A2	NM_000089	chr7	26	94042295	94042548	37.01
COL1A2	NM_000089	chr7	27	94042902	94043130	43.67
COL1A2	NM_000089	chr7	28	94043132	94043359	44.3
COL1A2	NM_000089	chr7	29	94043434	94043687	39.76
COL1A2	NM_000089	chr7	30	94044438	94044682	36.73
COL1A2	NM_000089	chr7	31	94045617	94045915	44.15
COL1A2	NM_000089	chr7	32	94046936	94047243	46.43
COL1A2	NM_000089	chr7	33	94047711	94047964	31.89
COL1A2	NM_000089	chr7	34	94048710	94048963	44.49
COL1A2	NM_000089	chr7	35	94049445	94049650	50
COL1A2	NM_000089	chr7	36	94049652	94049804	45.1
COL1A2	NM_000089	chr7	37	94049806	94050060	49.8
COL1A2	NM_000089	chr7	38	94050221	94050474	41.34
COL1A2	NM_000089	chr7	39	94051111	94051364	43.31
COL1A2	NM_000089	chr7	40	94052169	94052530	47.79
COL1A2	NM_000089	chr7	41	94053548	94053855	43.51
COL1A2	NM_000089	chr7	42	94054329	94054636	48.38
COL1A2	NM_000089	chr7	43	94054822	94055018	49.24
COL1A2	NM_000089	chr7	44	94055020	94055239	53.64
COL1A2	NM_000089	chr7	45	94055241	94055463	42.6
COL1A2	NM_000089	chr7	46	94055635	94055942	44.48
COL1A2	NM_000089	chr7	47	94056220	94056436	43.78
COL1A2	NM_000089	chr7	48	94056438	94056707	50.74
COL1A2	NM_000089	chr7	49	94056839	94057297	49.24
COL1A2	NM_000089	chr7	50	94057505	94057889	39.22
COL1A2	NM_000089	chr7	51	94058400	94058842	43.12
COL1A2	NM_000089	chr7	52	94059459	94060644	33.39
COL4A5	NM_000495	chrX	1	107683054	107683536	52.17
COL4A5	NM_000495	chrX	2	107782876	107783135	34.23
COL4A5	NM_000495	chrX	3	107802194	107802483	42.41
COL4A5	NM_000495	chrX	4	107807012	107807256	32.24
COL4A5	NM_000495	chrX	5	107811759	107811946	31.38
COL4A5	NM_000495	chrX	6	107811948	107812151	39.22
COL4A5	NM_000495	chrX	7	107814543	107814796	36.61
COL4A5	NM_000495	chrX	8	107814941	107815167	34.8
COL4A5	NM_000495	chrX	9	107816704	107816984	34.88
COL4A5	NM_000495	chrX	10	107819040	107819302	37.26
COL4A5	NM_000495	chrX	11	107821082	107821262	32.6
COL4A5	NM_000495	chrX	12	107821264	107821435	38.95
COL4A5	NM_000495	chrX	13	107821437	107821713	38.27
COL4A5	NM_000495	chrX	14	107823663	107823864	42.57
COL4A5	NM_000495	chrX	15	107823866	107824068	37.93
COL4A5	NM_000495	chrX	16	107824113	107824357	38.78
COL4A5	NM_000495	chrX	17	107826014	107826267	38.98
COL4A5	NM_000495	chrX	18	107827614	107827855	33.47
COL4A5	NM_000495	chrX	19	107829745	107830077	39.64
COL4A5	NM_000495	chrX	20	107834188	107834561	42.78
COL4A5	NM_000495	chrX	21	107834691	107834974	42.25
COL4A5	NM_000495	chrX	22	107838639	107838931	38.23
COL4A5	NM_000495	chrX	23	107840128	107840398	35.42
COL4A5	NM_000495	chrX	24	107840507	107840898	42.35
COL4A5	NM_000495	chrX	25	107841832	107842200	44.17
COL4A5	NM_000495	chrX	26	107844523	107844815	39.59
COL4A5	NM_000495	chrX	27	107845015	107845319	45.9
COL4A5	NM_000495	chrX	28	107846094	107846391	43.62
COL4A5	NM_000495	chrX	29	107849872	107850222	46.15
COL4A5	NM_000495	chrX	30	107858041	107858354	41.08
COL4A5	NM_000495	chrX	31	107863389	107863756	41.58
COL4A5	NM_000495	chrX	32	107864933	107865222	38.62
COL4A5	NM_000495	chrX	33	107865806	107866155	38.29
COL4A5	NM_000495	chrX	34	107867366	107867664	41.47
COL4A5	NM_000495	chrX	35	107868835	107869124	40
COL4A5	NM_000495	chrX	36	107869340	107869679	38.53
COL4A5	NM_000495	chrX	37	107898461	107898787	41.59
COL4A5	NM_000495	chrX	38	107908637	107908917	38.43
COL4A5	NM_000495	chrX	39	107909626	107909924	41.81
COL4A5	NM_000495	chrX	40	107910263	107910513	33.86
COL4A5	NM_000495	chrX	41	107911449	107911834	46.89
COL4A5	NM_000495	chrX	42	107920630	107920963	41.92
COL4A5	NM_000495	chrX	43	107923809	107924048	41.67
COL4A5	NM_000495	chrX	44	107924050	107924286	45.15
COL4A5	NM_000495	chrX	45	107924890	107925218	42.25
COL4A5	NM_000495	chrX	46	107929161	107929459	48.49
COL4A5	NM_000495	chrX	47	107930612	107931024	43.83
COL4A5	NM_000495	chrX	48	107935878	107936255	43.12
COL4A5	NM_000495	chrX	49	107937937	107938251	43.17
COL4A5	NM_000495	chrX	50	107938397	107938769	44.5
COL4A5	NM_000495	chrX	51	107939427	107940875	32.51
COMP	NM_000095	chr19	1	18901874	18902214	69.79
COMP	NM_000095	chr19	2	18901542	18901872	69.49
COMP	NM_000095	chr19	3	18901271	18901540	61.48
COMP	NM_000095	chr19	4	18900651	18901023	73.19
COMP	NM_000095	chr19	5	18899847	18900206	65.56
COMP	NM_000095	chr19	6	18899605	18899845	63.49
COMP	NM_000095	chr19	7	18899364	18899603	75.83
COMP	NM_000095	chr19	8	18899175	18899362	70.74
COMP	NM_000095	chr19	9	18898921	18899173	63.24
COMP	NM_000095	chr19	10	18898200	18898559	64.44
COMP	NM_000095	chr19	11	18897223	18897560	57.4
COMP	NM_000095	chr19	12	18897004	18897221	61.01
COMP	NM_000095	chr19	13	18896720	18897002	66.43
COMP	NM_000095	chr19	14	18896421	18896718	64.09
COMP	NM_000095	chr19	15	18896208	18896419	66.51
COMP	NM_000095	chr19	16	18895606	18896002	61.21
COMP	NM_000095	chr19	17	18894901	18895273	64.08
COMP	NM_000095	chr19	18	18893819	18894103	64.91
COMP	NM_000095	chr19	19	18893484	18893817	64.37
CRTAP	NM_006371	chr3	1	33155350	33156140	73.45
CRTAP	NM_006371	chr3	2	33161736	33162085	41.14
CRTAP	NM_006371	chr3	3	33165800	33166171	52.69
CRTAP	NM_006371	chr3	4	33171331	33171659	36.17
CRTAP	NM_006371	chr3	5	33173947	33174292	47.69
CRTAP	NM_006371	chr3	6	33175574	33175857	41.55
CRTAP	NM_006371	chr3	7	33183787	33189364	47.42
CSRP3	NM_003476	chr11	1	19223401	19223689	52.6
CSRP3	NM_003476	chr11	2	19213784	19214123	49.41
CSRP3	NM_003476	chr11	3	19209583	19209951	55.28
CSRP3	NM_003476	chr11	4	19207663	19207995	49.55
CSRP3	NM_003476	chr11	5	19206399	19206692	47.62
CSRP3	NM_003476	chr11	6	19203478	19204393	37.55
CSTB	NM_000100	chr21	1	45195985	45196359	76.8
CSTB	NM_000100	chr21	2	45194377	45194740	56.04
CSTB	NM_000100	chr21	3	45193732	45194375	49.53
CTF1	NM_001330	chr16	1	30907828	30908089	68.32
CTF1	NM_001330	chr16	2	30910636	30910954	57.37
CTF1	NM_001330	chr16	3	30913299	30914980	62.9
CTNS	NM_004937	chr17	1	3539662	3540225	70.04
CTNS	NM_004937	chr17	2	3540301	3540710	56.34
CTNS	NM_004937	chr17	3	3543382	3543661	41.79
CTNS	NM_004937	chr17	4	3550638	3550916	58.42
CTNS	NM_004937	chr17	5	3552041	3552325	44.56
CTNS	NM_004937	chr17	6	3558192	3558455	54.17
CTNS	NM_004937	chr17	7	3558457	3558746	58.62
CTNS	NM_004937	chr17	8	3559681	3559925	63.27
CTNS	NM_004937	chr17	9	3559927	3560189	61.22
CTNS	NM_004937	chr17	10	3561199	3561569	64.69
CTNS	NM_004937	chr17	11	3563052	3563369	63.84
CTNS	NM_004937	chr17	12	3563430	3566496	55.75
CTSK	NM_000396	chr1	1	150780590	150780912	47.37
CTSK	NM_000396	chr1	2	150779062	150779382	49.84
CTSK	NM_000396	chr1	3	150778537	150778800	40.15
CTSK	NM_000396	chr1	4	150778237	150778535	46.15
CTSK	NM_000396	chr1	5	150776397	150776815	44.39
CTSK	NM_000396	chr1	6	150771886	150772285	45
CTSK	NM_000396	chr1	7	150771544	150771884	44.28
CTSK	NM_000396	chr1	8	150768587	150769474	41.1
CYP21A2	NM_000500	chr6	1	32005982	32006450	61.62
CYP21A2	NM_000500	chr6	2	32006452	32006688	48.95
CYP21A2	NM_000500	chr6	3	32006771	32007079	62.46
CYP21A2	NM_000500	chr6	4	32007081	32007278	63.13
CYP21A2	NM_000500	chr6	5	32007280	32007475	51.53
CYP21A2	NM_000500	chr6	6	32007477	32007697	59.73
CYP21A2	NM_000500	chr6	7	32007699	32008082	62.76
CYP21A2	NM_000500	chr6	8	32008084	32008403	67.5
CYP21A2	NM_000500	chr6	9	32008405	32008597	63.21
CYP21A2	NM_000500	chr6	10	32008599	32009519	63.74
DBT	NM_001918	chr1	1	100715226	100715509	59.51
DBT	NM_001918	chr1	2	100706217	100706540	29.01
DBT	NM_001918	chr1	3	100700892	100701167	29.71
DBT	NM_001918	chr1	4	100696189	100696570	31.94
DBT	NM_001918	chr1	5	100684082	100684403	34.78
DBT	NM_001918	chr1	6	100681439	100681855	32.61
DBT	NM_001918	chr1	7	100680273	100680639	34.88
DBT	NM_001918	chr1	8	100676150	100676427	34.17
DBT	NM_001918	chr1	9	100671931	100672292	37.29
DBT	NM_001918	chr1	10	100671686	100671929	35.66
DBT	NM_001918	chr1	11	100652379	100662078	39.04
DES	NM_001927	chr2	1	220282999	220283862	70.72
DES	NM_001927	chr2	2	220284717	220284925	58.85
DES	NM_001927	chr2	3	220284927	220285142	57.87
DES	NM_001927	chr2	4	220285144	220285464	59.81
DES	NM_001927	chr2	5	220285466	220285775	59.03
DES	NM_001927	chr2	6	220285962	220286382	60.1
DES	NM_001927	chr2	7	220288399	220288642	61.07
DES	NM_001927	chr2	8	220290285	220290567	59.01
DES	NM_001927	chr2	9	220290571	220291559	62.08
DLD	NM_000108	chr7	1	107531486	107531834	64.47
DLD	NM_000108	chr7	2	107533545	107533823	34.77
DLD	NM_000108	chr7	3	107542083	107542362	33.21
DLD	NM_000108	chr7	4	107542670	107542938	33.83
DLD	NM_000108	chr7	5	107543823	107544092	29.63
DLD	NM_000108	chr7	6	107545303	107545603	32.56
DLD	NM_000108	chr7	7	107545706	107546049	30.23
DLD	NM_000108	chr7	8	107546612	107546913	35.43
DLD	NM_000108	chr7	9	107555851	107556241	31.2
DLD	NM_000108	chr7	10	107557139	107557509	32.88
DLD	NM_000108	chr7	11	107557618	107558007	40.26
DLD	NM_000108	chr7	12	107558269	107558606	38.46
DLD	NM_000108	chr7	13	107559355	107559591	37.13
DLD	NM_000108	chr7	14	107559593	107561742	34.19
DMD	NM_004006	chrX	1	33229299	33229773	39.37
DMD	NM_004006	chrX	2	33038156	33038417	25.95
DMD	NM_004006	chrX	3	32867745	32868037	36.18
DMD	NM_004006	chrX	4	32862800	32863077	40.65
DMD	NM_004006	chrX	5	32841312	32841604	32.08
DMD	NM_004006	chrX	6	32834485	32834857	36.46
DMD	NM_004006	chrX	7	32827510	32827828	36.68
DMD	NM_004006	chrX	8	32717129	32717510	33.51
DMD	NM_004006	chrX	9	32715887	32716215	44.68
DMD	NM_004006	chrX	10	32662981	32663369	35.22
DMD	NM_004006	chrX	11	32662149	32662530	36.39
DMD	NM_004006	chrX	12	32632320	32632670	35.33
DMD	NM_004006	chrX	13	32613774	32614093	30.63
DMD	NM_004006	chrX	14	32591810	32592063	40.55
DMD	NM_004006	chrX	15	32591547	32591808	30.15
DMD	NM_004006	chrX	16	32583719	32584098	37.63
DMD	NM_004006	chrX	17	32563176	32563551	41.76
DMD	NM_004006	chrX	18	32536025	32536348	33.02
DMD	NM_004006	chrX	19	32519772	32520059	37.85
DMD	NM_004006	chrX	20	32509294	32509735	37.56
DMD	NM_004006	chrX	21	32502936	32503316	36.48
DMD	NM_004006	chrX	22	32490181	32490526	36.71
DMD	NM_004006	chrX	23	32486515	32486927	34.87
DMD	NM_004006	chrX	24	32482603	32482916	37.58
DMD	NM_004006	chrX	25	32481456	32481811	38.48
DMD	NM_004006	chrX	26	32472679	32473049	33.15
DMD	NM_004006	chrX	27	32466473	32466855	38.12
DMD	NM_004006	chrX	28	32459197	32459531	31.34
DMD	NM_004006	chrX	29	32456258	32456607	33.71
DMD	NM_004006	chrX	30	32429769	32430130	38.95
DMD	NM_004006	chrX	31	32407991	32408398	34.8
DMD	NM_004006	chrX	32	32407518	32407989	33.9
DMD	NM_004006	chrX	33	32404327	32404682	33.43
DMD	NM_004006	chrX	34	32398527	32398897	31.27
DMD	NM_004006	chrX	35	32382984	32383416	37.41
DMD	NM_004006	chrX	36	32382599	32382982	31.51
DMD	NM_004006	chrX	37	32380805	32381175	45.82
DMD	NM_004006	chrX	38	32366423	32366745	32.2
DMD	NM_004006	chrX	39	32363960	32364297	30.47
DMD	NM_004006	chrX	40	32361151	32361503	33.43
DMD	NM_004006	chrX	41	32360117	32360499	45.17
DMD	NM_004006	chrX	42	32328099	32328493	37.47
DMD	NM_004006	chrX	43	32305546	32305918	34.58
DMD	NM_004006	chrX	44	32234933	32235280	33.05
DMD	NM_004006	chrX	45	31986356	31986731	40.43
DMD	NM_004006	chrX	46	31950097	31950444	31.9
DMD	NM_004006	chrX	47	31947613	31947962	41.14
DMD	NM_004006	chrX	48	31893208	31893590	30.29
DMD	NM_004006	chrX	49	31854735	31855039	38.36
DMD	NM_004006	chrX	50	31837992	31838300	38.51
DMD	NM_004006	chrX	51	31791977	31792409	38.11
DMD	NM_004006	chrX	52	31747648	31747965	37.42
DMD	NM_004006	chrX	53	31697392	31697803	33.98
DMD	NM_004006	chrX	54	31676007	31676361	38.31
DMD	NM_004006	chrX	55	31645690	31646079	42.31
DMD	NM_004006	chrX	56	31525298	31525670	38.07
DMD	NM_004006	chrX	57	31514805	31515161	39.78
DMD	NM_004006	chrX	58	31497000	31497320	42.06
DMD	NM_004006	chrX	59	31496123	31496591	46.91
DMD	NM_004006	chrX	60	31462498	31462844	40.35
DMD	NM_004006	chrX	61	31366573	31366851	36.92
DMD	NM_004006	chrX	62	31341615	31341875	38.31
DMD	NM_004006	chrX	63	31278972	31279233	35.88
DMD	NM_004006	chrX	64	31241064	31241338	41.82
DMD	NM_004006	chrX	65	31227515	31227916	44.78
DMD	NM_004006	chrX	66	31224599	31224884	36.71
DMD	NM_004006	chrX	67	31221978	31222335	41.34
DMD	NM_004006	chrX	68	31200755	31201121	43.87
DMD	NM_004006	chrX	69	31198387	31198698	38.14
DMD	NM_004006	chrX	70	31196686	31197022	42.73
DMD	NM_004006	chrX	71	31195949	31196187	38.91
DMD	NM_004006	chrX	72	31191556	31191821	37.59
DMD	NM_004006	chrX	73	31190365	31190630	34.59
DMD	NM_004006	chrX	74	31187460	31187818	41.5
DMD	NM_004006	chrX	75	31165292	31165735	43.24
DMD	NM_004006	chrX	76	31164308	31164631	42.59
DMD	NM_004006	chrX	77	31152119	31152411	40.96
DMD	NM_004006	chrX	78	31144659	31144890	40.09
DMD	NM_004006	chrX	79	31137245	31140147	33.62
DMPK	NM_004409	chr19	1	46285351	46285915	69.2
DMPK	NM_004409	chr19	2	46282910	46283227	62.89
DMPK	NM_004409	chr19	3	46282659	46282908	62
DMPK	NM_004409	chr19	4	46282422	46282657	65.25
DMPK	NM_004409	chr19	5	46281616	46281999	63.02
DMPK	NM_004409	chr19	6	46281260	46281614	61.13
DMPK	NM_004409	chr19	7	46280888	46281258	64.15
DMPK	NM_004409	chr19	8	46280485	46280886	63.43
DMPK	NM_004409	chr19	9	46278107	46278392	60.14
DMPK	NM_004409	chr19	10	46275799	46276110	61.86
DMPK	NM_004409	chr19	11	46274978	46275286	66.34
DMPK	NM_004409	chr19	12	46274742	46274976	66.81
DMPK	NM_004409	chr19	13	46274465	46274740	63.77
DMPK	NM_004409	chr19	14	46274065	46274463	69.42
DMPK	NM_004409	chr19	15	46272876	46274063	65.99
DSC2	NM_024422	chr18	1	28681766	28682488	67.36
DSC2	NM_024422	chr18	2	28673422	28673706	29.82
DSC2	NM_024422	chr18	3	28671964	28672363	33
DSC2	NM_024422	chr18	4	28670891	28671210	36.56
DSC2	NM_024422	chr18	5	28669302	28669657	34.83
DSC2	NM_024422	chr18	6	28667532	28667876	34.2
DSC2	NM_024422	chr18	7	28666439	28666805	41.14
DSC2	NM_024422	chr18	8	28662792	28663126	32.24
DSC2	NM_024422	chr18	9	28662104	28662489	29.27
DSC2	NM_024422	chr18	10	28660010	28660418	35.45
DSC2	NM_024422	chr18	11	28659713	28660008	34.12
DSC2	NM_024422	chr18	12	28654549	28654973	36.71
DSC2	NM_024422	chr18	13	28651471	28651907	37.3
DSC2	NM_024422	chr18	14	28650592	28650916	34.15
DSC2	NM_024422	chr18	15	28648760	28649217	43.89
DSC2	NM_024422	chr18	16	28645844	28648278	30.72
DSG2	NM_001943	chr18	1	29077927	29078359	76.21
DSG2	NM_001943	chr18	2	29098102	29098337	35.59
DSG2	NM_001943	chr18	3	29099666	29100000	36.72
DSG2	NM_001943	chr18	4	29100666	29100994	30.7
DSG2	NM_001943	chr18	5	29100996	29101306	32.15
DSG2	NM_001943	chr18	6	29101946	29102312	32.97
DSG2	NM_001943	chr18	7	29104311	29104607	35.02
DSG2	NM_001943	chr18	8	29104609	29104951	35.28
DSG2	NM_001943	chr18	9	29110850	29111315	34.12
DSG2	NM_001943	chr18	10	29115133	29115475	27.99
DSG2	NM_001943	chr18	11	29116065	29116492	37.85
DSG2	NM_001943	chr18	12	29118614	29119041	43.93
DSG2	NM_001943	chr18	13	29121056	29121377	42.24
DSG2	NM_001943	chr18	14	29122383	29122915	48.78
DSG2	NM_001943	chr18	15	29125584	29128913	38.26
DSP	NM_004415	chr6	1	7541770	7542418	72.27
DSP	NM_004415	chr6	2	7555851	7556153	50.17
DSP	NM_004415	chr6	3	7558249	7558597	45.85
DSP	NM_004415	chr6	4	7559359	7559733	50.4
DSP	NM_004415	chr6	5	7562785	7563113	49.24
DSP	NM_004415	chr6	6	7563869	7564119	43.43
DSP	NM_004415	chr6	7	7565492	7565853	48.07
DSP	NM_004415	chr6	8	7566510	7566814	34.1
DSP	NM_004415	chr6	9	7567487	7567782	37.16
DSP	NM_004415	chr6	10	7567914	7568239	46.93
DSP	NM_004415	chr6	11	7568570	7568922	36.54
DSP	NM_004415	chr6	12	7569319	7569673	49.3
DSP	NM_004415	chr6	13	7570570	7570896	52.91
DSP	NM_004415	chr6	14	7571516	7571917	45.27
DSP	NM_004415	chr6	15	7571975	7572401	39.34
DSP	NM_004415	chr6	16	7574219	7574585	34.06
DSP	NM_004415	chr6	17	7574790	7575128	43.66
DSP	NM_004415	chr6	18	7575428	7575821	42.13
DSP	NM_004415	chr6	19	7576427	7576789	36.91
DSP	NM_004415	chr6	20	7577092	7577375	31.34
DSP	NM_004415	chr6	21	7577912	7578219	45.45
DSP	NM_004415	chr6	22	7578597	7578895	32.44
DSP	NM_004415	chr6	23	7579408	7581902	46.29
DSP	NM_004415	chr6	24	7582775	7587046	44.94
EMD	NM_000117	chrX	1	153607497	153607988	72.97
EMD	NM_000117	chrX	2	153607990	153608228	70.71
EMD	NM_000117	chrX	3	153608230	153608479	56.8
EMD	NM_000117	chrX	4	153608494	153608827	58.38
EMD	NM_000117	chrX	5	153609013	153609202	59.47
EMD	NM_000117	chrX	6	153609204	153609981	58.1
EPCAM	NM_002354	chr2	1	47596187	47596820	74.76
EPCAM	NM_002354	chr2	2	47600502	47600809	32.14
EPCAM	NM_002354	chr2	3	47600847	47601287	40.82
EPCAM	NM_002354	chr2	4	47602273	47602538	31.95
EPCAM	NM_002354	chr2	5	47604053	47604316	35.61
EPCAM	NM_002354	chr2	6	47605992	47606293	27.48
EPCAM	NM_002354	chr2	7	47606808	47607208	37.66
EPCAM	NM_002354	chr2	8	47612205	47612449	34.69
EPCAM	NM_002354	chr2	9	47613611	47614265	30.69
F5	NM_000130	chr1	1	169555367	169555869	57.65
F5	NM_000130	chr1	2	169551569	169551860	26.71
F5	NM_000130	chr1	3	169541359	169541681	34.67
F5	NM_000130	chr1	4	169529692	169530104	47.94
F5	NM_000130	chr1	5	169528291	169528634	42.15
F5	NM_000130	chr1	6	169525784	169526205	48.34
F5	NM_000130	chr1	7	169524320	169524685	41.26
F5	NM_000130	chr1	8	169521695	169522072	33.33
F5	NM_000130	chr1	9	169519778	169520077	40.33
F5	NM_000130	chr1	10	169518939	169519353	37.83
F5	NM_000130	chr1	11	169515580	169515930	41.03
F5	NM_000130	chr1	12	169513434	169513846	43.83
F5	NM_000130	chr1	13	169509432	169512452	45.38
F5	NM_000130	chr1	14	169505644	169506018	38.13
F5	NM_000130	chr1	15	169499924	169500360	41.19
F5	NM_000130	chr1	16	169498746	169499156	37.96
F5	NM_000130	chr1	17	169497053	169497432	46.84
F5	NM_000130	chr1	18	169495039	169495355	36.91
F5	NM_000130	chr1	19	169493975	169494246	36.03
F5	NM_000130	chr1	20	169492939	169493242	34.87
F5	NM_000130	chr1	21	169492335	169492690	39.04
F5	NM_000130	chr1	22	169489658	169490002	33.04
F5	NM_000130	chr1	23	169487550	169487901	44.03
F5	NM_000130	chr1	24	169484582	169484964	38.64
F5	NM_000130	chr1	25	169481092	169483797	36.1
F8	NM_000132	chrX	1	154250585	154251098	44.94
F8	NM_000132	chrX	2	154227654	154227975	40.06
F8	NM_000132	chrX	3	154225148	154225470	43.65
F8	NM_000132	chrX	4	154221111	154221523	40.19
F8	NM_000132	chrX	5	154215412	154215680	33.83
F8	NM_000132	chrX	6	154212862	154213178	48.58
F8	NM_000132	chrX	7	154197506	154197927	39.34
F8	NM_000132	chrX	8	154194560	154195062	41.15
F8	NM_000132	chrX	9	154194145	154194558	37.2
F8	NM_000132	chrX	10	154189250	154189543	34.69
F8	NM_000132	chrX	11	154185132	154185546	39.28
F8	NM_000132	chrX	12	154182067	154182417	40.46
F8	NM_000132	chrX	13	154175873	154176282	38.29
F8	NM_000132	chrX	14	154156746	154160051	40.2
F8	NM_000132	chrX	15	154134595	154134948	37.29
F8	NM_000132	chrX	16	154132944	154133398	36.04
F8	NM_000132	chrX	17	154132469	154132942	41.56
F8	NM_000132	chrX	18	154132081	154132467	39.79
F8	NM_000132	chrX	19	154130226	154130542	40.06
F8	NM_000132	chrX	20	154129546	154129817	37.5
F8	NM_000132	chrX	21	154128041	154128326	39.16
F8	NM_000132	chrX	22	154124252	154124607	37.08
F8	NM_000132	chrX	23	154091258	154091602	41.45
F8	NM_000132	chrX	24	154089893	154090241	43.84
F8	NM_000132	chrX	25	154088607	154088983	41.38
F8	NM_000132	chrX	26	154063970	154066127	39.25
FAH	NM_000137	chr15	1	80445241	80445577	68.25
FAH	NM_000137	chr15	2	80450302	80450612	51.77
FAH	NM_000137	chr15	3	80451998	80452319	55.9
FAH	NM_000137	chr15	4	80452652	80452901	56.8
FAH	NM_000137	chr15	5	80454488	80454778	46.74
FAH	NM_000137	chr15	6	80460294	80460548	50.98
FAH	NM_000137	chr15	7	80460550	80460758	52.15
FAH	NM_000137	chr15	8	80464391	80464690	50.33
FAH	NM_000137	chr15	9	80465256	80465586	58.01
FAH	NM_000137	chr15	10	80467258	80467533	60.87
FAH	NM_000137	chr15	11	80469779	80470025	41.3
FAH	NM_000137	chr15	12	80472366	80472667	64.57
FAH	NM_000137	chr15	13	80473284	80473601	54.72
FAH	NM_000137	chr15	14	80478372	80478782	54.74
FBN1	NM_000138	chr15	1	48937672	48938018	65.42
FBN1	NM_000138	chr15	2	48936703	48937247	66.61
FBN1	NM_000138	chr15	3	48905107	48905389	36.4
FBN1	NM_000138	chr15	4	48902825	48903123	42.14
FBN1	NM_000138	chr15	5	48892236	48892531	36.49
FBN1	NM_000138	chr15	6	48888380	48888675	41.22
FBN1	NM_000138	chr15	7	48829708	48830105	48.24
FBN1	NM_000138	chr15	8	48826177	48826502	38.65
FBN1	NM_000138	chr15	9	48818227	48818552	37.73
FBN1	NM_000138	chr15	10	48812756	48813114	52.37
FBN1	NM_000138	chr15	11	48808280	48808659	39.21
FBN1	NM_000138	chr15	12	48807484	48807824	43.7
FBN1	NM_000138	chr15	13	48805646	48805965	43.44
FBN1	NM_000138	chr15	14	48802141	48802466	37.12
FBN1	NM_000138	chr15	15	48800679	48801001	36.84
FBN1	NM_000138	chr15	16	48797122	48797444	42.72
FBN1	NM_000138	chr15	17	48795884	48796236	47.59
FBN1	NM_000138	chr15	18	48791082	48791335	45.28
FBN1	NM_000138	chr15	19	48789363	48789688	35.28
FBN1	NM_000138	chr15	20	48788197	48788522	34.66
FBN1	NM_000138	chr15	21	48787563	48787885	34.37
FBN1	NM_000138	chr15	22	48787220	48787561	42.4
FBN1	NM_000138	chr15	23	48786301	48786551	33.07
FBN1	NM_000138	chr15	24	48784558	48784883	33.13
FBN1	NM_000138	chr15	25	48781948	48782375	50.23
FBN1	NM_000138	chr15	26	48780503	48780790	44.44
FBN1	NM_000138	chr15	27	48780210	48780501	47.26
FBN1	NM_000138	chr15	28	48779455	48779734	51.07
FBN1	NM_000138	chr15	29	48779172	48779453	35.46
FBN1	NM_000138	chr15	30	48777471	48777793	42.72
FBN1	NM_000138	chr15	31	48775915	48776240	38.04
FBN1	NM_000138	chr15	32	48773752	48774077	32.52
FBN1	NM_000138	chr15	33	48766651	48766947	37.71
FBN1	NM_000138	chr15	34	48766352	48766649	40.6
FBN1	NM_000138	chr15	35	48764648	48764973	46.32
FBN1	NM_000138	chr15	36	48762731	48763053	47.37
FBN1	NM_000138	chr15	37	48760456	48760831	40.43
FBN1	NM_000138	chr15	38	48760035	48760454	40.24
FBN1	NM_000138	chr15	39	48757940	48758155	33.8
FBN1	NM_000138	chr15	40	48757665	48757938	42.7
FBN1	NM_000138	chr15	41	48755996	48756318	40.25
FBN1	NM_000138	chr15	42	48755179	48755537	40.95
FBN1	NM_000138	chr15	43	48752343	48752614	36.4
FBN1	NM_000138	chr15	44	48748734	48749059	43.87
FBN1	NM_000138	chr15	45	48744659	48744981	45.82
FBN1	NM_000138	chr15	46	48740865	48741190	31.6
FBN1	NM_000138	chr15	47	48738803	48739119	39.43
FBN1	NM_000138	chr15	48	48737473	48737801	40.73
FBN1	NM_000138	chr15	49	48736638	48736957	38.44
FBN1	NM_000138	chr15	50	48733818	48734143	43.25
FBN1	NM_000138	chr15	51	48729776	48730214	41.23
FBN1	NM_000138	chr15	52	48729398	48729774	40.05
FBN1	NM_000138	chr15	53	48729058	48729396	32.45
FBN1	NM_000138	chr15	54	48726691	48727010	37.5
FBN1	NM_000138	chr15	55	48724963	48725285	44.27
FBN1	NM_000138	chr15	56	48722768	48723099	41.27
FBN1	NM_000138	chr15	57	48720443	48720768	48.16
FBN1	NM_000138	chr15	58	48719664	48720070	43.73
FBN1	NM_000138	chr15	59	48717814	48718161	32.76
FBN1	NM_000138	chr15	60	48717466	48717812	44.96
FBN1	NM_000138	chr15	61	48714018	48714365	42.53
FBN1	NM_000138	chr15	62	48713655	48714016	48.07
FBN1	NM_000138	chr15	63	48712784	48713103	49.38
FBN1	NM_000138	chr15	64	48707633	48708064	52.55
FBN1	NM_000138	chr15	65	48704666	48705040	49.6
FBN1	NM_000138	chr15	66	48700405	48703676	35.88
FGD1	NM_004463	chrX	1	54521459	54522699	74.38
FGD1	NM_004463	chrX	2	54497647	54498020	56.15
FGD1	NM_004463	chrX	3	54496955	54497293	59
FGD1	NM_004463	chrX	4	54496349	54496953	61.82
FGD1	NM_004463	chrX	5	54495120	54495409	53.1
FGD1	NM_004463	chrX	6	54494117	54494465	59.6
FGD1	NM_004463	chrX	7	54492077	54492385	55.02
FGD1	NM_004463	chrX	8	54491784	54492075	57.88
FGD1	NM_004463	chrX	9	54482872	54483100	55.9
FGD1	NM_004463	chrX	10	54482553	54482870	51.26
FGD1	NM_004463	chrX	11	54482044	54482317	54.74
FGD1	NM_004463	chrX	12	54481781	54482042	54.96
FGD1	NM_004463	chrX	13	54476604	54476834	47.62
FGD1	NM_004463	chrX	14	54475898	54476293	50
FGD1	NM_004463	chrX	15	54475490	54475896	59.46
FGD1	NM_004463	chrX	16	54475139	54475488	59.71
FGD1	NM_004463	chrX	17	54473644	54473987	53.78
FGD1	NM_004463	chrX	18	54471789	54472947	55.39
FGFR2	NM_000141	chr10	1	123357376	123358072	74.75
FGFR2	NM_000141	chr10	2	123353123	123353581	51.2
FGFR2	NM_000141	chr10	3	123324852	123325318	51.61
FGFR2	NM_000141	chr10	4	123323916	123324193	47.12
FGFR2	NM_000141	chr10	5	123310704	123311073	45.14
FGFR2	NM_000141	chr10	6	123298006	123298329	44.75
FGFR2	NM_000141	chr10	7	123279393	123279783	53.96
FGFR2	NM_000141	chr10	8	123276733	123277077	46.67
FGFR2	NM_000141	chr10	9	123274531	123274933	49.63
FGFR2	NM_000141	chr10	10	123263204	123263555	48.86
FGFR2	NM_000141	chr10	11	123260240	123260561	51.86
FGFR2	NM_000141	chr10	12	123257909	123258219	42.44
FGFR2	NM_000141	chr10	13	123255946	123256336	46.8
FGFR2	NM_000141	chr10	14	123247405	123247727	40.25
FGFR2	NM_000141	chr10	15	123246768	123247038	41.7
FGFR2	NM_000141	chr10	16	123244809	123245146	50.89
FGFR2	NM_000141	chr10	17	123243112	123243417	44.77
FGFR2	NM_000141	chr10	18	123237745	123239635	38.76
FGFR3	NM_000142	chr4	1	1794939	1795292	82.2
FGFR3	NM_000142	chr4	2	1795460	1795870	78.1
FGFR3	NM_000142	chr4	3	1800881	1801350	67.87
FGFR3	NM_000142	chr4	4	1801374	1801639	67.29
FGFR3	NM_000142	chr4	5	1802994	1803305	70.51
FGFR3	NM_000142	chr4	6	1803307	1803516	70
FGFR3	NM_000142	chr4	7	1803518	1803852	68.96
FGFR3	NM_000142	chr4	8	1805319	1805663	62.61
FGFR3	NM_000142	chr4	9	1805957	1806347	67.26
FGFR3	NM_000142	chr4	10	1806451	1806796	67.92
FGFR3	NM_000142	chr4	11	1806982	1807244	68.44
FGFR3	NM_000142	chr4	12	1807246	1807436	64.92
FGFR3	NM_000142	chr4	13	1807438	1807722	69.12
FGFR3	NM_000142	chr4	14	1807724	1807942	65.3
FGFR3	NM_000142	chr4	15	1807944	1808154	66.82
FGFR3	NM_000142	chr4	16	1808173	1808483	68.49
FGFR3	NM_000142	chr4	17	1808485	1808752	68.66
FGFR3	NM_000142	chr4	18	1808754	1810699	55.19
FH	NM_000143	chr1	1	241682791	241683154	69.51
FH	NM_000143	chr1	2	241680382	241680716	36.72
FH	NM_000143	chr1	3	241676803	241677113	37.3
FH	NM_000143	chr1	4	241675167	241675543	35.01
FH	NM_000143	chr1	5	241671803	241672185	36.03
FH	NM_000143	chr1	6	241669203	241669568	33.88
FH	NM_000143	chr1	7	241667242	241667645	40.84
FH	NM_000143	chr1	8	241665643	241665970	36.28
FH	NM_000143	chr1	9	241663637	241663990	37.57
FH	NM_000143	chr1	10	241660806	241661370	31.68
FKRP	NM_024301	chr19	1	47249203	47249447	79.18
FKRP	NM_024301	chr19	2	47251184	47251445	47.33
FKRP	NM_024301	chr19	3	47251672	47252022	50.71
FKRP	NM_024301	chr19	4	47258569	47261932	61.21
FMR1	NM_002024	chrX	1	146993409	146993848	75.23
FMR1	NM_002024	chrX	2	147003351	147003603	26.09
FMR1	NM_002024	chrX	3	147006958	147007251	34.69
FMR1	NM_002024	chrX	4	147009740	147010011	31.99
FMR1	NM_002024	chrX	5	147010077	147010425	29.8
FMR1	NM_002024	chrX	6	147011367	147011603	30.8
FMR1	NM_002024	chrX	7	147011605	147011863	39.77
FMR1	NM_002024	chrX	8	147013844	147014159	37.97
FMR1	NM_002024	chrX	9	147014161	147014382	33.33
FMR1	NM_002024	chrX	10	147017923	147018232	33.23
FMR1	NM_002024	chrX	11	147018885	147019219	32.24
FMR1	NM_002024	chrX	12	147019518	147019780	39.54
FMR1	NM_002024	chrX	13	147021995	147022281	34.49
FMR1	NM_002024	chrX	14	147024551	147024946	36.36
FMR1	NM_002024	chrX	15	147026289	147026671	43.6
FMR1	NM_002024	chrX	16	147026954	147027236	35.34
FMR1	NM_002024	chrX	17	147030103	147032739	32.04
FXN	NM_000144	chr9	1	71650379	71650963	67.69
FXN	NM_000144	chr9	2	71661201	71661498	40.6
FXN	NM_000144	chr9	3	71667956	71668276	36.76
FXN	NM_000144	chr9	4	71679754	71680051	38.59
FXN	NM_000144	chr9	5	71687428	71694093	43.52
G6PC	NM_000151	chr17	1	41052715	41053223	48.33
G6PC	NM_000151	chr17	2	41055848	41056157	48.39
G6PC	NM_000151	chr17	3	41059440	41059745	53.92
G6PC	NM_000151	chr17	4	41061220	41061535	49.37
G6PC	NM_000151	chr17	5	41062832	41065486	46.55
G6PD	NM_001042351	chrX	1	153775583	153775887	67.21
G6PD	NM_001042351	chrX	2	153774151	153774478	54.57
G6PD	NM_001042351	chrX	3	153764310	153764493	57.61
G6PD	NM_001042351	chrX	4	153764052	153764308	64.98
G6PD	NM_001042351	chrX	5	153763283	153763700	62.2
G6PD	NM_001042351	chrX	6	153762466	153762811	63.87
G6PD	NM_001042351	chrX	7	153762069	153762464	59.6
G6PD	NM_001042351	chrX	8	153761691	153762067	57.82
G6PD	NM_001042351	chrX	9	153761089	153761443	61.69
G6PD	NM_001042351	chrX	10	153760731	153761087	63.03
G6PD	NM_001042351	chrX	11	153760550	153760729	62.78
G6PD	NM_001042351	chrX	12	153760356	153760548	63.73
G6PD	NM_001042351	chrX	13	153759506	153760354	63.72
GAA	NM_000152	chr17	1	78075255	78075789	74.39
GAA	NM_000152	chr17	2	78078254	78079031	66.32
GAA	NM_000152	chr17	3	78079448	78079793	61.85
GAA	NM_000152	chr17	4	78081256	78081560	68.85
GAA	NM_000152	chr17	5	78081562	78081795	69.66
GAA	NM_000152	chr17	6	78081989	78082248	63.85
GAA	NM_000152	chr17	7	78082250	78082451	67.33
GAA	NM_000152	chr17	8	78082453	78082727	64.73
GAA	NM_000152	chr17	9	78083644	78083954	64.31
GAA	NM_000152	chr17	10	78084426	78084689	65.53
GAA	NM_000152	chr17	11	78084691	78084924	58.55
GAA	NM_000152	chr17	12	78085682	78085999	67.61
GAA	NM_000152	chr17	13	78086277	78086592	68.35
GAA	NM_000152	chr17	14	78086594	78086921	64.94
GAA	NM_000152	chr17	15	78086923	78087265	69.68
GAA	NM_000152	chr17	16	78090667	78091008	63.74
GAA	NM_000152	chr17	17	78091299	78091648	67.71
GAA	NM_000152	chr17	18	78091892	78092256	66.58
GAA	NM_000152	chr17	19	78092352	78092704	62.04
GAA	NM_000152	chr17	20	78092971	78093778	60.02
GALC	NM_000153	chr14	1	88459214	88460007	63.48
GALC	NM_000153	chr14	2	88454677	88454967	33.33
GALC	NM_000153	chr14	3	88454388	88454675	34.72
GALC	NM_000153	chr14	4	88452733	88453046	41.4
GALC	NM_000153	chr14	5	88450638	88450977	38.53
GALC	NM_000153	chr14	6	88448449	88448687	28.87
GALC	NM_000153	chr14	7	88442602	88442932	36.56
GALC	NM_000153	chr14	8	88434579	88434934	34.55
GALC	NM_000153	chr14	9	88431749	88432073	38.77
GALC	NM_000153	chr14	10	88429628	88429955	32.93
GALC	NM_000153	chr14	11	88416903	88417192	29.66
GALC	NM_000153	chr14	12	88416089	88416375	31.36
GALC	NM_000153	chr14	13	88413972	88414322	42.17
GALC	NM_000153	chr14	14	88411797	88412177	37.8
GALC	NM_000153	chr14	15	88407639	88408002	35.44
GALC	NM_000153	chr14	16	88406149	88406425	33.21
GALC	NM_000153	chr14	17	88399260	88401322	35.72
GALT	NM_000155	chr9	1	34646535	34646883	67.05
GALT	NM_000155	chr9	2	34646986	34647355	61.89
GALT	NM_000155	chr9	3	34647389	34647609	57.47
GALT	NM_000155	chr9	4	34647611	34647765	48.39
GALT	NM_000155	chr9	5	34647767	34648035	59.11
GALT	NM_000155	chr9	6	34648037	34648249	52.58
GALT	NM_000155	chr9	7	34648251	34648553	52.81
GALT	NM_000155	chr9	8	34648659	34648943	56.84
GALT	NM_000155	chr9	9	34648945	34649178	51.28
GALT	NM_000155	chr9	10	34649307	34649661	54.37
GALT	NM_000155	chr9	11	34650266	34650671	45.32
GBA	NM_000157	chr1	1	155210694	155211153	48.91
GBA	NM_000157	chr1	2	155210321	155210692	55.11
GBA	NM_000157	chr1	3	155209617	155209968	56.53
GBA	NM_000157	chr1	4	155209307	155209615	46.6
GBA	NM_000157	chr1	5	155208204	155208541	49.7
GBA	NM_000157	chr1	6	155207825	155208202	56.08
GBA	NM_000157	chr1	7	155207032	155207469	54.11
GBA	NM_000157	chr1	8	155205936	155206360	54.35
GBA	NM_000157	chr1	9	155205289	155205735	55.03
GBA	NM_000157	chr1	10	155204940	155205287	58.91
GBA	NM_000157	chr1	11	155204144	155204938	56.23
GCDH	NM_000159	chr19	1	13001874	13002050	61.58
GCDH	NM_000159	chr19	2	13002052	13002255	69.61
GCDH	NM_000159	chr19	3	13002257	13002436	59.44
GCDH	NM_000159	chr19	4	13002545	13002859	64.44
GCDH	NM_000159	chr19	5	13002861	13003092	53.88
GCDH	NM_000159	chr19	6	13004197	13004567	59.57
GCDH	NM_000159	chr19	7	13006706	13006977	58.09
GCDH	NM_000159	chr19	8	13006979	13007335	62.75
GCDH	NM_000159	chr19	9	13007624	13007927	63.16
GCDH	NM_000159	chr19	10	13008017	13008342	64.42
GCDH	NM_000159	chr19	11	13008417	13008777	60.94
GCDH	NM_000159	chr19	12	13010182	13010882	50.78
GCH1	NM_000161	chr14	1	55368939	55369642	71.59
GCH1	NM_000161	chr14	2	55331945	55332254	32.58
GCH1	NM_000161	chr14	3	55326299	55326554	39.84
GCH1	NM_000161	chr14	4	55313717	55313948	29.31
GCH1	NM_000161	chr14	5	55312386	55312670	44.21
GCH1	NM_000161	chr14	6	55308624	55310961	36.27
GHR	NM_000163	chr5	1	42423926	42424157	68.97
GHR	NM_000163	chr5	2	42565866	42566146	41.64
GHR	NM_000163	chr5	3	42629040	42629305	37.59
GHR	NM_000163	chr5	4	42688892	42689221	42.73
GHR	NM_000163	chr5	5	42694919	42695291	35.12
GHR	NM_000163	chr5	6	42699826	42700204	36.94
GHR	NM_000163	chr5	7	42711209	42711574	36.61
GHR	NM_000163	chr5	8	42713431	42713721	29.9
GHR	NM_000163	chr5	9	42718054	42718323	30
GHR	NM_000163	chr5	10	42718455	42722025	38.06
GJB2	NM_004004	chr13	1	20766822	20767214	77.35
GJB2	NM_004004	chr13	2	20761506	20763842	41.85
GJB6	NM_006783	chr13	1	20804905	20805472	48.94
GJB6	NM_006783	chr13	2	20803619	20803988	48.11
GJB6	NM_006783	chr13	3	20796002	20797734	43.16
GLA	NM_000169	chrX	1	100662598	100663101	52.38
GLA	NM_000169	chrX	2	100658699	100659073	44.8
GLA	NM_000169	chrX	3	100656520	100656897	43.92
GLA	NM_000169	chrX	4	100655554	100655845	36.99
GLA	NM_000169	chrX	5	100653666	100654034	41.19
GLA	NM_000169	chrX	6	100653224	100653664	40.82
GLA	NM_000169	chrX	7	100652679	100653222	43.57
GLI3	NM_000168	chr7	1	42276470	42276718	77.91
GLI3	NM_000168	chr7	2	42262629	42262994	45.63
GLI3	NM_000168	chr7	3	42187725	42188167	50.34
GLI3	NM_000168	chr7	4	42116251	42116556	41.18
GLI3	NM_000168	chr7	5	42087990	42088395	50.49
GLI3	NM_000168	chr7	6	42084883	42085229	48.13
GLI3	NM_000168	chr7	7	42079537	42079938	44.03
GLI3	NM_000168	chr7	8	42065698	42066111	55.31
GLI3	NM_000168	chr7	9	42064763	42065076	55.73
GLI3	NM_000168	chr7	10	42062967	42063307	50.73
GLI3	NM_000168	chr7	11	42018098	42018447	46
GLI3	NM_000168	chr7	12	42017057	42017421	46.85
GLI3	NM_000168	chr7	13	42011836	42012326	52.95
GLI3	NM_000168	chr7	14	42007094	42007621	49.05
GLI3	NM_000168	chr7	15	42000450	42006339	49.2
GPD1L	NM_015141	chr3	1	32148044	32148350	76.87
GPD1L	NM_015141	chr3	2	32169468	32169845	38.89
GPD1L	NM_015141	chr3	3	32179979	32180319	47.51
GPD1L	NM_015141	chr3	4	32181620	32181958	47.79
GPD1L	NM_015141	chr3	5	32188014	32188326	39.94
GPD1L	NM_015141	chr3	6	32200268	32200701	60.37
GPD1L	NM_015141	chr3	7	32200960	32201266	37.79
GPD1L	NM_015141	chr3	8	32207206	32210296	39.7
GPR143	NM_000273	chrX	1	9733508	9734017	75.69
GPR143	NM_000273	chrX	2	9728657	9728966	45.81
GPR143	NM_000273	chrX	3	9727272	9727566	49.15
GPR143	NM_000273	chrX	4	9716514	9716806	60.41
GPR143	NM_000273	chrX	5	9713984	9714293	51.61
GPR143	NM_000273	chrX	6	9711505	9711813	43.04
GPR143	NM_000273	chrX	7	9709278	9709595	36.48
GPR143	NM_000273	chrX	8	9707425	9707859	58.39
GPR143	NM_000273	chrX	9	9693354	9693980	46.25
GRHPR	NM_012203	chr9	1	37422607	37422930	72.84
GRHPR	NM_012203	chr9	2	37424742	37425072	67.37
GRHPR	NM_012203	chr9	3	37425819	37426091	47.99
GRHPR	NM_012203	chr9	4	37426435	37426751	53.63
GRHPR	NM_012203	chr9	5	37428381	37428669	64.36
GRHPR	NM_012203	chr9	6	37429629	37429933	55.74
GRHPR	NM_012203	chr9	7	37430408	37430743	56.85
GRHPR	NM_012203	chr9	8	37431905	37432235	56.5
GRHPR	NM_012203	chr9	9	37436558	37437086	50.66
HADHA	NM_000182	chr2	1	26467298	26467694	65
HADHA	NM_000182	chr2	2	26461923	26462111	50.85
HADHA	NM_000182	chr2	3	26461702	26461921	41.73
HADHA	NM_000182	chr2	4	26459623	26459956	43.72
HADHA	NM_000182	chr2	5	26456985	26457323	46.3
HADHA	NM_000182	chr2	6	26454928	26455247	50.33
HADHA	NM_000182	chr2	7	26452960	26453262	52.25
HADHA	NM_000182	chr2	8	26437822	26438144	47.77
HADHA	NM_000182	chr2	9	26437212	26437530	52.73
HADHA	NM_000182	chr2	10	26435339	26435595	54.09
HADHA	NM_000182	chr2	11	26432549	26432858	50.91
HADHA	NM_000182	chr2	12	26426831	26427165	55.48
HADHA	NM_000182	chr2	13	26423918	26424289	54.1
HADHA	NM_000182	chr2	14	26420460	26420746	50.83
HADHA	NM_000182	chr2	15	26417861	26418201	68.01
HADHA	NM_000182	chr2	16	26417339	26417607	27.51
HADHA	NM_000182	chr2	17	26416346	26416741	34.09
HADHA	NM_000182	chr2	18	26415079	26415393	36.23
HADHA	NM_000182	chr2	19	26414310	26414597	38.94
HADHA	NM_000182	chr2	20	26413405	26414308	37.19
HBA1	NM_000558	chr16	1	226579	226869	41.91
HBA1	NM_000558	chr16	2	226871	227207	39.94
HBA1	NM_000558	chr16	3	227209	227620	34.48
HBA2	NM_000517	chr16	1	222746	223065	35.41
HBA2	NM_000517	chr16	2	223067	223399	40.32
HBA2	NM_000517	chr16	3	223401	223808	44.18
HBB	NM_000518	chr11	1	5248096	5248401	39.52
HBB	NM_000518	chr11	2	5247707	5248094	46.34
HBB	NM_000518	chr11	3	5246596	5247056	46.92
HEXA	NM_000520	chr15	1	72667961	72668620	49.07
HEXA	NM_000520	chr15	2	72648766	72649058	52.27
HEXA	NM_000520	chr15	3	72647800	72648065	44.13
HEXA	NM_000520	chr15	4	72645932	72646178	55.21
HEXA	NM_000520	chr15	5	72645309	72645619	51.99
HEXA	NM_000520	chr15	6	72643374	72643675	72.85
HEXA	NM_000520	chr15	7	72642759	72643091	67.36
HEXA	NM_000520	chr15	8	72641320	72641700	64.32
HEXA	NM_000520	chr15	9	72640246	72640575	74.06
HEXA	NM_000520	chr15	10	72639927	72640244	66.67
HEXA	NM_000520	chr15	11	72638769	72639151	63.97
HEXA	NM_000520	chr15	12	72638476	72638767	53.27
HEXA	NM_000520	chr15	13	72637687	72637991	50
HEXA	NM_000520	chr15	14	72635679	72636581	41.65
HOXD13	NM_000523	chr2	1	176957432	176958499	68.45
HOXD13	NM_000523	chr2	2	176959108	176960766	39.66
HTT	NM_002111	chr4	1	3076308	3076915	74.34
HTT	NM_002111	chr4	2	3088566	3088849	33.8
HTT	NM_002111	chr4	3	3100901	3101221	43.61
HTT	NM_002111	chr4	4	3105451	3105710	31.92
HTT	NM_002111	chr4	5	3106984	3107263	48.57
HTT	NM_002111	chr4	6	3108912	3109250	46.9
HTT	NM_002111	chr4	7	3116931	3117272	42.69
HTT	NM_002111	chr4	8	3117712	3118090	49.34
HTT	NM_002111	chr4	9	3122855	3123259	46.17
HTT	NM_002111	chr4	10	3124516	3124763	33.47
HTT	NM_002111	chr4	11	3127176	3127456	44.13
HTT	NM_002111	chr4	12	3128891	3129431	52.68
HTT	NM_002111	chr4	13	3131551	3131874	46.6
HTT	NM_002111	chr4	14	3131932	3132250	38.24
HTT	NM_002111	chr4	15	3132913	3133224	44.87
HTT	NM_002111	chr4	16	3133265	3133602	43.49
HTT	NM_002111	chr4	17	3134189	3134494	46.08
HTT	NM_002111	chr4	18	3134496	3134738	37.45
HTT	NM_002111	chr4	19	3136028	3136367	47.35
HTT	NM_002111	chr4	20	3137531	3137794	42.42
HTT	NM_002111	chr4	21	3137853	3138153	34.22
HTT	NM_002111	chr4	22	3142137	3142483	43.23
HTT	NM_002111	chr4	23	3144393	3144713	32.4
HTT	NM_002111	chr4	24	3146779	3147055	33.94
HTT	NM_002111	chr4	25	3148424	3148775	46.02
HTT	NM_002111	chr4	26	3149632	3150034	50.87
HTT	NM_002111	chr4	27	3155920	3156246	38.84
HTT	NM_002111	chr4	28	3158699	3159026	33.84
HTT	NM_002111	chr4	29	3161909	3162219	51.45
HTT	NM_002111	chr4	30	3173947	3174224	41.73
HTT	NM_002111	chr4	31	3174535	3174958	48.58
HTT	NM_002111	chr4	32	3176348	3176599	44.05
HTT	NM_002111	chr4	33	3176601	3176934	34.13
HTT	NM_002111	chr4	34	3178959	3179214	27.73
HTT	NM_002111	chr4	35	3179925	3180273	38.68
HTT	NM_002111	chr4	36	3182142	3182478	42.43
HTT	NM_002111	chr4	37	3183981	3184297	49.53
HTT	NM_002111	chr4	38	3188224	3188546	46.13
HTT	NM_002111	chr4	39	3189278	3189713	38.3
HTT	NM_002111	chr4	40	3190578	3190920	39.94
HTT	NM_002111	chr4	41	3201359	3201766	53.68
HTT	NM_002111	chr4	42	3205634	3205975	44.74
HTT	NM_002111	chr4	43	3208123	3208468	44.8
HTT	NM_002111	chr4	44	3208470	3208810	45.16
HTT	NM_002111	chr4	45	3208908	3209184	41.88
HTT	NM_002111	chr4	46	3210400	3210738	47.79
HTT	NM_002111	chr4	47	3211454	3211776	50.77
HTT	NM_002111	chr4	48	3213556	3213969	43.48
HTT	NM_002111	chr4	49	3214191	3214536	52.89
HTT	NM_002111	chr4	50	3215585	3215962	56.35
HTT	NM_002111	chr4	51	3216737	3217038	43.38
HTT	NM_002111	chr4	52	3219392	3219779	53.61
HTT	NM_002111	chr4	53	3221809	3222135	52.29
HTT	NM_002111	chr4	54	3224014	3224314	54.15
HTT	NM_002111	chr4	55	3225033	3225387	58.59
HTT	NM_002111	chr4	56	3225619	3225958	46.76
HTT	NM_002111	chr4	57	3227288	3227570	62.19
HTT	NM_002111	chr4	58	3230242	3230539	55.03
HTT	NM_002111	chr4	59	3230541	3230836	56.08
HTT	NM_002111	chr4	60	3231514	3231869	57.87
HTT	NM_002111	chr4	61	3234790	3235180	64.71
HTT	NM_002111	chr4	62	3236911	3237208	56.71
HTT	NM_002111	chr4	63	3237210	3237605	58.59
HTT	NM_002111	chr4	64	3237776	3238081	50.65
HTT	NM_002111	chr4	65	3240074	3240436	58.95
HTT	NM_002111	chr4	66	3240445	3240805	62.6
HTT	NM_002111	chr4	67	3241473	3245786	56.12
IDS	NM_000202	chrX	1	148586465	148586964	66.8
IDS	NM_000202	chrX	2	148585587	148585923	56.38
IDS	NM_000202	chrX	3	148584742	148585119	55.29
IDS	NM_000202	chrX	4	148582380	148582668	39.79
IDS	NM_000202	chrX	5	148579538	148579938	48.38
IDS	NM_000202	chrX	6	148577777	148578147	48.52
IDS	NM_000202	chrX	7	148571745	148572071	43.43
IDS	NM_000202	chrX	8	148568356	148568729	41.18
IDS	NM_000202	chrX	9	148560197	148564849	39.24
IDUA	NM_000203	chr4	1	980685	981130	77.35
IDUA	NM_000203	chr4	2	981497	981837	68.62
IDUA	NM_000203	chr4	3	994300	994577	65.83
IDUA	NM_000203	chr4	4	994579	994877	64.55
IDUA	NM_000203	chr4	5	995156	995409	59.84
IDUA	NM_000203	chr4	6	995411	995719	70.87
IDUA	NM_000203	chr4	7	995721	996003	72.44
IDUA	NM_000203	chr4	8	996005	996373	72.36
IDUA	NM_000203	chr4	9	996420	996778	77.72
IDUA	NM_000203	chr4	10	996780	997039	79.23
IDUA	NM_000203	chr4	11	997041	997297	77.82
IDUA	NM_000203	chr4	12	997299	997513	70.23
IDUA	NM_000203	chr4	13	997700	997974	63.27
IDUA	NM_000203	chr4	14	997976	998416	59.64
IL2RG	NM_000206	chrX	1	70331089	70331503	54.7
IL2RG	NM_000206	chrX	2	70330644	70331087	51.58
IL2RG	NM_000206	chrX	3	70330251	70330642	46.68
IL2RG	NM_000206	chrX	4	70329906	70330249	49.71
IL2RG	NM_000206	chrX	5	70328978	70329340	49.31
IL2RG	NM_000206	chrX	6	70328324	70328645	45.96
IL2RG	NM_000206	chrX	7	70327951	70328322	51.61
IL2RG	NM_000206	chrX	8	70327159	70327949	52.09
INPP5E	NM_019892	chr9	1	139332960	139334356	74.73
INPP5E	NM_019892	chr9	2	139329092	139329415	66.36
INPP5E	NM_019892	chr9	3	139328389	139328686	66.78
INPP5E	NM_019892	chr9	4	139327569	139327831	68.82
INPP5E	NM_019892	chr9	5	139327225	139327567	62.97
INPP5E	NM_019892	chr9	6	139326831	139327223	65.9
INPP5E	NM_019892	chr9	7	139326176	139326537	67.96
INPP5E	NM_019892	chr9	8	139325354	139325669	64.56
INPP5E	NM_019892	chr9	9	139324629	139324965	62.91
INPP5E	NM_019892	chr9	10	139322975	139324359	54.73
IVD	NM_002225	chr15	1	40697586	40698272	60.7
IVD	NM_002225	chr15	2	40699737	40700026	54.83
IVD	NM_002225	chr15	3	40700038	40700289	48.41
IVD	NM_002225	chr15	4	40702727	40703096	52.16
IVD	NM_002225	chr15	5	40703359	40703652	51.36
IVD	NM_002225	chr15	6	40703654	40703990	51.93
IVD	NM_002225	chr15	7	40705090	40705386	53.2
IVD	NM_002225	chr15	8	40706988	40707281	58.84
IVD	NM_002225	chr15	9	40707500	40707781	56.03
IVD	NM_002225	chr15	10	40708177	40708435	57.14
IVD	NM_002225	chr15	11	40708437	40708661	60.89
IVD	NM_002225	chr15	12	40710229	40713612	51.68
KCNE1	NM_000219	chr21	1	35883299	35883713	53.98
KCNE1	NM_000219	chr21	2	35830852	35831162	42.77
KCNE1	NM_000219	chr21	3	35818889	35822082	49.66
KCNE2	NM_172201	chr21	1	35736223	35736550	42.07
KCNE2	NM_172201	chr21	2	35742666	35743540	42.06
KCNH2	NM_000238	chr7	1	150674826	150675114	76.47
KCNH2	NM_000238	chr7	2	150671699	150672129	70.77
KCNH2	NM_000238	chr7	3	150656560	150656924	59.73
KCNH2	NM_000238	chr7	4	150655047	150655690	75
KCNH2	NM_000238	chr7	5	150654279	150654690	63.11
KCNH2	NM_000238	chr7	6	150649413	150650041	62.8
KCNH2	NM_000238	chr7	7	150648374	150649023	63.23
KCNH2	NM_000238	chr7	8	150647909	150648372	64.44
KCNH2	NM_000238	chr7	9	150647156	150647608	63.58
KCNH2	NM_000238	chr7	10	150645789	150646237	58.35
KCNH2	NM_000238	chr7	11	150645432	150645787	63.2
KCNH2	NM_000238	chr7	12	150644650	150645066	73.38
KCNH2	NM_000238	chr7	13	150644281	150644648	67.39
KCNH2	NM_000238	chr7	14	150643865	150644279	66.02
KCNH2	NM_000238	chr7	15	150641950	150642702	60.29
KCNJ2	NM_000891	chr17	1	68165576	68165942	65.4
KCNJ2	NM_000891	chr17	2	68170865	68176281	39.91
KCNQ1	NM_000218	chr11	1	2466121	2466814	77.95
KCNQ1	NM_000218	chr11	2	2549058	2549348	64.95
KCNQ1	NM_000218	chr11	3	2591758	2592084	63.91
KCNQ1	NM_000218	chr11	4	2592455	2592733	66.67
KCNQ1	NM_000218	chr11	5	2593143	2593439	68.69
KCNQ1	NM_000218	chr11	6	2593976	2594316	61.58
KCNQ1	NM_000218	chr11	7	2604565	2604875	63.34
KCNQ1	NM_000218	chr11	8	2606342	2606637	60.81
KCNQ1	NM_000218	chr11	9	2608700	2609022	66.25
KCNQ1	NM_000218	chr11	10	2609843	2610184	58.77
KCNQ1	NM_000218	chr11	11	2683091	2683411	59.81
KCNQ1	NM_000218	chr11	12	2789974	2790249	60.14
KCNQ1	NM_000218	chr11	13	2797090	2797384	64.41
KCNQ1	NM_000218	chr11	14	2798116	2798362	59.11
KCNQ1	NM_000218	chr11	15	2799106	2799367	64.12
KCNQ1	NM_000218	chr11	16	2868897	2870439	62.48
KIT	NM_001093772	chr4	1	55523995	55524348	71.47
KIT	NM_001093772	chr4	2	55561578	55562047	42.77
KIT	NM_001093772	chr4	3	55564350	55564831	47.72
KIT	NM_001093772	chr4	4	55565696	55566032	40.65
KIT	NM_001093772	chr4	5	55569790	55570158	32.79
KIT	NM_001093772	chr4	6	55573164	55573553	35.9
KIT	NM_001093772	chr4	7	55575490	55575805	37.97
KIT	NM_001093772	chr4	8	55589650	55589964	42.54
KIT	NM_001093772	chr4	9	55591923	55592304	38.22
KIT	NM_001093772	chr4	10	55593284	55593536	45.06
KIT	NM_001093772	chr4	11	55593538	55593808	39.11
KIT	NM_001093772	chr4	12	55593889	55594135	44.94
KIT	NM_001093772	chr4	13	55594137	55594387	40.24
KIT	NM_001093772	chr4	14	55595401	55595751	36.75
KIT	NM_001093772	chr4	15	55597394	55597685	42.81
KIT	NM_001093772	chr4	16	55597937	55598264	39.63
KIT	NM_001093772	chr4	17	55599136	55599458	33.13
KIT	NM_001093772	chr4	18	55602564	55602831	39.18
KIT	NM_001093772	chr4	19	55602833	55603086	43.31
KIT	NM_001093772	chr4	20	55603241	55603546	47.39
KIT	NM_001093772	chr4	21	55604495	55606979	38.83
KRT1	NM_006121	chr12	1	53073442	53074291	52.47
KRT1	NM_006121	chr12	2	53072168	53072640	43.55
KRT1	NM_006121	chr12	3	53071847	53072166	40.94
KRT1	NM_006121	chr12	4	53071351	53071629	44.09
KRT1	NM_006121	chr12	5	53071036	53071349	45.22
KRT1	NM_006121	chr12	6	53070743	53071034	43.84
KRT1	NM_006121	chr12	7	53069959	53070379	53.68
KRT1	NM_006121	chr12	8	53069449	53069628	51.67
KRT1	NM_006121	chr12	9	53068420	53069447	54.28
KRT10	NM_000421	chr17	1	38978111	38978963	49.36
KRT10	NM_000421	chr17	2	38977105	38977469	38.08
KRT10	NM_000421	chr17	3	38976721	38977103	42.82
KRT10	NM_000421	chr17	4	38976472	38976719	40.32
KRT10	NM_000421	chr17	5	38976145	38976470	35.28
KRT10	NM_000421	chr17	6	38975593	38976143	40.83
KRT10	NM_000421	chr17	7	38974888	38975591	58.24
KRT10	NM_000421	chr17	8	38974270	38974886	32.41
LAMA3	NM_000227	chr18	1	21452884	21453279	55.56
LAMA3	NM_000227	chr18	2	21456158	21456471	40.45
LAMA3	NM_000227	chr18	3	21461800	21462109	53.55
LAMA3	NM_000227	chr18	4	21464637	21464917	56.23
LAMA3	NM_000227	chr18	5	21469875	21470181	45.93
LAMA3	NM_000227	chr18	6	21474162	21474412	39.44
LAMA3	NM_000227	chr18	7	21474771	21475122	59.66
LAMA3	NM_000227	chr18	8	21478602	21478865	35.23
LAMA3	NM_000227	chr18	9	21478867	21479129	30.42
LAMA3	NM_000227	chr18	10	21479152	21479519	44.29
LAMA3	NM_000227	chr18	11	21480991	21481387	45.09
LAMA3	NM_000227	chr18	12	21482873	21483189	33.75
LAMA3	NM_000227	chr18	13	21483797	21484151	46.76
LAMA3	NM_000227	chr18	14	21484417	21484758	52.92
LAMA3	NM_000227	chr18	15	21485386	21485688	39.93
LAMA3	NM_000227	chr18	16	21487414	21487675	42.75
LAMA3	NM_000227	chr18	17	21487677	21487999	44.58
LAMA3	NM_000227	chr18	18	21489017	21489359	38.78
LAMA3	NM_000227	chr18	19	21492575	21492945	43.67
LAMA3	NM_000227	chr18	20	21494274	21494593	48.75
LAMA3	NM_000227	chr18	21	21494595	21494924	30.3
LAMA3	NM_000227	chr18	22	21495153	21495486	34.43
LAMA3	NM_000227	chr18	23	21496415	21496759	40
LAMA3	NM_000227	chr18	24	21500799	21501118	43.44
LAMA3	NM_000227	chr18	25	21501316	21501649	34.43
LAMA3	NM_000227	chr18	26	21507987	21508304	43.08
LAMA3	NM_000227	chr18	27	21508489	21508829	38.71
LAMA3	NM_000227	chr18	28	21510926	21511265	37.06
LAMA3	NM_000227	chr18	29	21512024	21512355	46.08
LAMA3	NM_000227	chr18	30	21513646	21513999	46.89
LAMA3	NM_000227	chr18	31	21519087	21519450	51.1
LAMA3	NM_000227	chr18	32	21523652	21524035	50
LAMA3	NM_000227	chr18	33	21526008	21526348	40.18
LAMA3	NM_000227	chr18	34	21529629	21529940	47.12
LAMA3	NM_000227	chr18	35	21529942	21530223	46.81
LAMA3	NM_000227	chr18	36	21531548	21531841	54.76
LAMA3	NM_000227	chr18	37	21532854	21533173	50
LAMA3	NM_000227	chr18	38	21534367	21535127	34.03
LAMB3	NM_000228	chr1	1	209825614	209825920	59.28
LAMB3	NM_000228	chr1	2	209824162	209824426	47.92
LAMB3	NM_000228	chr1	3	209823209	209823563	55.21
LAMB3	NM_000228	chr1	4	209811779	209812093	53.33
[truncated: 1,383 more rows]
