# Supplementary material for: Identification of Sequence Variants in Genetic Disease-Causing Genes Using Targeted Next-Generation Sequencing
Source: PLoS One. 2011 Dec 21;6(12):e29500. doi: 10.1371/journal.pone.0029500 (PMC3244462; doi:10.1371/journal.pone.0029500)
Supplement: Table S3 — The list of our own polymorphism database for these 193 genes in 100 blood samples from 100 human adults. (XLSX) [file pone.0029500.s005.xlsx]

## Sheet: Sheet1
Chromosome	Position	Refence Sequence	Allele	Gene Symbol	NM NO.	Variation	Positive Samples	Status	SIFT prediction	Allele frequency in 100 controls
chr1	45796899	C	C/G	MUTYH	NM_001048171	T463T	P7	Known	not scored	0.034
chr1	100347158	A	A/G	AGL	NM_000642	H740R	P4	Novel	tolerated	0.004
chr1	156838353	G	A/G	NTRK1	NM_001007792	V181M	P3	Novel	damaging	0.009
chr1	169495229	C	C/G	F5	NM_000130	A1876P	P6	Novel	tolerated	0.004
chr1	169524538	T	C/T	F5	NM_000130	R334G	P4	Known	damaging	0.021
chr1	183194828	C	C/T	LAMC2	NM_005562	R347C	P2	Novel	damaging	0.009
chr1	201330429	T	C/T	TNNT2	NM_000364	K260R	P6	Known	tolerated	0.047
chr1	215848154	C	C/T	USH2A	NM_206933	V4367I	P7	Novel	tolerated	0.004
chr1	216017788	C	C/T	USH2A	NM_206933	V3036I	P2	Novel	tolerated	0.004
chr1	216074125	A	A/G	USH2A	NM_206933	S2475P	P1	Novel	tolerated	0.004
chr1	216138781	A	A/G	USH2A	NM_206933	V2333A	P3	Novel	damaging	0.009
chr10	73405729	G	A/G	CDH23	NM_022124	D428N	P1	Novel	tolerated	0.009
chr10	73501595	C	C/T	CDH23	NM_022124	R1588W	P5	Novel	damaging	0.009
chr11	17417496	G	A/G	ABCC8	NM_000352	IVS33-19C-T	P2,P3	Known	not scored	0.03
chr12	2224393	C	C/G	CACNA1C	NM_001129843	S18C	P5,P7	Novel	damaging	0.009
chr12	32948971	C	C/T	PKP2	NM_004572	IVS12+72G-A	P1	Known	not scored	0.043
chr12	32974218	T	C/T	PKP2	NM_004572	IVS10+72A-G	P7	Known	not scored	0.009
chr12	33021934	A	A/G	PKP2	NM_004572	L366P	P2,P7	Known	tolerated	0.043
chr12	53069036	A	A/T	KRT1	NM_006121	S626T	P3	Novel	damaging	0.004
chr12	88452772	C	C/T	CEP290	NM_025114	R2224Q	P6	Novel	damaging	0.004
chr13	52523878	T	C/T	ATP7B	NM_000053	I929V	P7	Novel	tolerated	0.013
chr15	34521966	A	A/G	TMEM85	NM_016454	S177G	P3	Novel	damaging	0
chr15	72638961	G	A/G	HEXA	NM_000520	R413W	P2	Novel	damaging	0.004
chr15	91310239	G	A/G	BLM	NM_000057	V765I	P2	Novel	damaging	0.004
chr16	2141139	C	C/T	PKD1	NM_000296	A3916T	P5	Novel	tolerated	0.004
chr16	2147751	A	A/C	PKD1	NM_000296	L3399V	P3	Novel	tolerated	0.004
chr16	2152383	G	C/G	PKD1	NM_000296	P3067R	P6	Novel	damaging	0
chr16	2159767	G	A/G	PKD1	NM_000296	P1801S	P4	Novel	tolerated	0.004
chr18	21523922	G	A/G	LAMA3	NM_198129	G3066E	P5	Novel	damaging	0.009
chr18	29101230	T	A/T	DSG2	NM_001943	IVS5+24T-A	P3	Known	not scored	0.026
chr18	29116462	T	C/T	DSG2	NM_001943	IVS11+70T-C	P3	Known	not scored	0.013
chr19	1223125	C	C/G	STK11	NM_000455	F354L	P6	Known	tolerated	0.021
chr19	1223151	C	C/T	STK11	NM_000455	T363I	P5	Novel	tolerated	0.004
chr2	215876849	G	A/G	ABCA12	NM_173076	P656L	P5,P7	Novel	damaging	0.009
chr2	215901688	G	A/G	ABCA12	NM_173076	S325F	P5,P7	Novel	damaging	0.017
chr2	241813437	C	C/T	AGXT	NM_000030	A213V	P6	Novel	damaging	0
chr3	37055949	A	A/T	MLH1	NM_000249	D235V	P6	Novel	damaging	0.004
chr3	37067240	T	A/T	MLH1	NM_000249	V384D	P5	Known	damaging	0.021
chr3	37070437	G	A/G	MLH1	NM_000249	IVS13+14G-A	P4	Known	not scored	0.03
chr3	38640439	C	A/C	SCN5A	NM_001160161	A665S	P7	Novel	tolerated	0.004
chr4	15591190	C	C/G	CC2D2A	NM_001080522	T1401S	P3	Novel	tolerated	0.004
chr5	131978019	A	A/G	RAD50	NM_005732	K1301R	P5,P7	Novel	tolerated	0.009
chr6	7577264	A	A/T	DSP	NM_004415	N956Y	P4	Novel	damaging	0.004
chr6	7583728	T	C/T	DSP	NM_004415	I2078T	P2	Novel	damaging	0.004
chr6	7586150	T	C/T	DSP	NM_004415	*39T-C	P1	Known	not scored	0.043
chr6	51611649	C	C/T	PKHD1	NM_138694	D3290N	P3	Novel	tolerated	0.004
chr6	51735427	C	C/T	PKHD1	NM_138694	C2454Y	P1	Novel	damaging	0.004
chr6	51909525	T	C/T	PKHD1	NM_138694	IVS25+239A-G	P2,P6	Known	not scored	0.034
chr6	51911407	C	C/T	PKHD1	NM_138694	IVS23-421G-A	P5	Known	not scored	0.03
chr6	51934733	C	A/C	PKHD1	NM_138694	IVS10-408G-T	P2,P6	Known	not scored	0.034
chr6	51934733	C	C/T	PKHD1	NM_138694	IVS10-408G-A	P5	Known	not scored	0.013
chr6	51936258	C	C/T	PKHD1	NM_138694	IVS8-390G-A	P2,P6	Known	not scored	0.034
chr6	51936506	G	C/G	PKHD1	NM_138694	IVS8+407C-G	P2,P6	Known	not scored	0.009
chr6	51936559	T	C/T	PKHD1	NM_138694	IVS8+354A-G	P2,P6	Known	not scored	0.021
chr7	42005564	G	A/G	GLI3	NM_000168	A1036V	P1	Novel	tolerated	0.004
chr7	42065917	C	C/G	GLI3	NM_000168	G375R	P7	Novel	damaging	0.004
chr7	91660853	G	A/G	AKAP9	NM_005751	E1425K	P1	Novel	damaging	0
chr7	92157886	A	A/G	PEX1	NM_000466	-137T-C	P4	Known	not scored	0.03
chr7	107323898	A	A/G	SLC26A4	NM_000441	IVS7-2A-G	P4	Known	not scored	0.009
chr7	117188797	A	A/G	CFTR	NM_000492	T438A	P5	Novel	tolerated	0
chr8	55539393	A	A/G	RP1	NM_006269	D984G	P5	Known	tolerated	0.004
chr8	118847782	G	A/G	EXT1	NM_000127	C355C	P2	Known	not scored	0.047
chr9	135802555	C	C/T	TSC1	NM_000368	IVS4+33G-A	P3	Known	not scored	0.004
chrX	31496426	T	C/T	DMD	NM_004006	N2912D	P4	Known	tolerated	0.024
chrX	31496431	T	A/T	DMD	NM_004006	E2910V	P4	Known	tolerated	0.024
chrX	148564431	G	A/A	IDS	NM_000202	T500I	P1	Novel	damaging	0
chr11	6411936..6411941	GCTGGC	HETROZYGOUS DELETION	SMPD1	NM_000543	108_113delGCTGGC	P5	Novel	-	-
chr12	53069223..53069243	ACCTCCGGAGCCGTAGCTGCT	HETROZYGOUS DELETION	KRT1	NM_006121	1669_1689delAGCAGCTACGGCTCCGGAGGT	P4	Novel	-	-
chr17	38975308..38975319	GCCGCCGTGGCC	HETROZYGOUS DELETION	KRT10	NM_000421	1468_1479delGGCCACGGCGGC	P1	Novel	-	-
chr2	215645503..215645523	TGGTGAAGAACATTCAGGCAA	HETROZYGOUS DELETION	BARD1	NM_000465	1744_1764delTTGCCTGAATGTTCTTCACCA	P5	Novel	-	-
chr6	7542148..7542149	CA	HETROZYGOUS INSERTION	DSP	NM_004415	1insA	P5	Novel	-	-
chr7	91652178..91652179	AA	HETROZYGOUS INSERTION	AKAP9	NM_005751	4003_4004insAAC	P1	Novel	-	-
