# Supplementary material for: Identification of Sequence Variants in Genetic Disease-Causing Genes Using Targeted Next-Generation Sequencing
Source: PLoS One. 2011 Dec 21;6(12):e29500. doi: 10.1371/journal.pone.0029500 (PMC3244462; doi:10.1371/journal.pone.0029500)
Supplement: Table S4 — The list of 29 exons with a median depth of less than 30-fold across the ten samples. (XLS) [file pone.0029500.s006.xls]

## Sheet: 10_sample_mediandepth
Gene name	Exon number	C1	C2	C3	P1	P2	P3	P4	P5	P6	P7	Mean depth	GC%	Median depth
CHEK2	14	0	0	0	0	0	0	0	0	0	0	0	40.93	0
PKD1	3	0	0	0	0	0	0	0	0	0	0	0	51.13	0
CYP21A2	8	0	0	0	0	0	0	0	0	0	0	0	67.5	0
PKD1	2	0	0	0	0	0	0	0	0	0	0	0	67.97	0
CYP21A2	9	0	0	0	0	0	1	0	1	0	0	0.2	63.21	0
FGFR3	1	0	2	0	1	1	0	0	0	0	0	0.4	82.2	0
PKD1	1	2	0	0	0	2	0	0	0	0	0	0.4	83.17	0
CYP21A2	2	0	0	2	0	0	5	0	5	5	0	1.7	48.95	0
ABCC1	1	8	3	0	7	2	2	1	2	0	2	2.7	83.92	2
PKD1	42	0	4	4	23	3	2	1	2	0	4	4.3	78.72	2.5
SCN5A	1	10	4	4	8	6	0	8	0	2	0	4.2	81.63	4
CYP21A2	7	0	2	8	6	3	9	2	4	10	4	4.8	62.76	4
PKD1	4	4	6	6	6	4	3	6	3	2	5	4.5	69.68	4.5
SCN1B	1	10	12	10	6	13	2	5	4	4	7	7.3	81.44	6.5
IDUA	11	20	30	3	29	9	6	24	6	2	3	13.2	77.82	7.5
COL1A2	3	0	12	0	5	6	13	60	54	116	8	27.4	23.72	10
CEP290	5	2	34	16	6	2	11	55	67	113	4	31	21.74	13.5
KCNQ1	1	25	17	15	26	15	2	5	0	3	21	12.9	77.95	15
KCNH2	1	27	21	17	21	28	14	9	4	5	11	15.7	76.47	15.5
SLC25A15	1	24	24	15	24	18	14	13	16	13	9	17	80.13	15.5
CYP21A2	1	0	8	16	13	14	42	16	24	43	15	19.1	61.62	15.5
CYP21A2	10	0	23	19	20	41	86	11	89	70	20	37.9	63.74	21.5
FKRP	1	49	40	21	32	32	20	23	14	10	23	26.4	79.18	23
SNTA1	1	37	38	25	30	34	23	22	15	27	21	27.2	78.01	26
CHEK2	15	34	34	39	25	17	15	38	7	20	31	26	40.09	28
PKD1	12	36	26	26	58	34	8	32	3	11	30	26.4	65.35	28
PKD1	21	34	27	28	40	31	28	25	14	18	28	27.3	65.62	28
CDH23	1	31	60	26	54	21	6	30	7	6	34	27.5	76.75	28
